# Supplementary material for: Shared Genetic Underpinnings of Gray Matter Volume Alterations and Metabolic Traits in Major Depressive Disorder
Source: Research Square preprint supplement (doi:10.21203/rs.3.rs-7971333/v1), 2025-12-01
Supplement: Supplementary file 1 [file 08b1351d92935610c2b5f1f8.xlsx]

## Sheet: Table S1
Table S1. The demographic information of each donor in the AHBA dataset.
Donor ID	Race	Gender	Age	Hemisphere
H0351.2001	Black/African American	Male	24	L + R
H0351.2002	Black/African American	Male	39	L + R
H0351.1009	White/Caucasian	Male	57	L
H0351.1012	White/Caucasian	Male	31	L
H0351.1015	Hispanic	Female	49	L
H0351.1016	White/Caucasian	Male	55	L
Abbreviations: AHBA, Allen Human Brain Atlas; ID, identification; L, left; R, right.

## Sheet: Table S2
Table S2. Demographic and clinical characteristics of the studies included in the major depressive disorder meta-analysis.
study	MDD						HC			Method
	Diagnosis	Diagnosis（criteria）	Sample size	M/F	Age(Y)mean (SD)	Disease duration (mean)(month)	Sample	M/F	Age(Y)	Software	Template	MRI field	FWHM	Threshold
MDD_Abe2010	MDD	DSM-IV	21	11/10	48.1（13.5）	72(86.4)	42	22/20	48.0(13.2)	spm5	MNI	1.5T	6	FDR,p<0.05
MDD_Arnone2013a	cMDD	DSM-IV	39	12/27	36.3 (8.8)	/	66	20/46	32.1 (9.3)	spm8	MNI	1.5	8	FWE,p<0.05
MDD_Arnone2013b	rMDD	DSM-IV	25	5/20	34.5 (11.0)	/	66	20/46	32.1 (9.3)	spm8	MNI	1.5T	8	FWE,p<0.05
MDD_Bergouignan2009	MDD	DSM-IV	21	4/17	33.16(9.58)	101.4(108.36)	21	7/14	28.21(5.50)	spm5	MNI	1.5T	8	FDR,p<0.05
MDD_Cai2015	MDD	DSM-IV	23	13/10	30.00(7.293)	52.2(28.584)	23	13/10	28.2(3.781)	spm8	MNI	3.0T	8	uncorrected,P<0.001
MDD_Chen2018	MDD	DSM-IV	36	20/16	30.7 (8.5)	32.1(47.1）	47	22/25	29.7(9.2)	spm12	MNI	3.0T	6	uncorrected,p < .001,α = .05
MDD_Cheng2010	MDD	DSM-IV (SCID)	68	21/47	29.91(7.92)	10.98（8.20）	68	21/47	30.54(7.30)	spm5	MNI	1.5T	10	uncorrected,P<0.001
MDD_Dannlowski2015	MDD	DSM-IV(SCID)	171	66/105	38.6(11.7)	/	512	223/289	33.3(11.6)	spm8	MNI	3.0T	8	P<0.001
MDD_Fang2015a	MDD	DSM-IV	20	12/8	59.2(3.7)	/	18	10/8	59.1(7.5)	spm8	MNI	1.5T	8	correct,P<0.05
MDD_Fang2015b	treated MDD	DSM-IV	20	12/8	59.2(3.7)	/	18	10/8	59.1(7.5)	spm8	MNI	1.5T	8	correct,P<0.05
MDD_Grieve2013	MDD	/	102	48/54	33.8(13.1)	135.6（141.6）	34	18/16	31.5(12.4)	spm8	MNI	3.0T	8	FDR,p<0.05
MDD_Guo2014	MDD	DSM-IV	44	22/22	27.52(8.57)	19.61（36.50）	44	20/24	29.39(6.70)	spm8	MNI	3.0T	8	GRF,P<0.001
MDD_Harada2016	MDD	/	45	19/26	60.2(8.2)	127.2(132)	61	17/44	62.9(7.6)	spm8	MNI	3.0T	8	FWE,p<0.05
MDD_Hwang2010	MDD	DSM-IV	70	NA	79.4 (5.3)	/	26	/	79.5 (4.3)	spm2	MNI	2.0T	8	uncorrected,P<0.001
MDD_Jia2010a	MDD(Nonattempters)	DSM-IV	36	20/16	34.7(12.5)	21(25)	52	24/28	37.1(16.0)	spm2	MNI	3.0T	6	uncorrected,P<0.05
MDD_Jia2010b	MDD(Suicide Attempters)	DSM-IV	16	5/11	34.2(13.7)	80(90)	52	24/28	37.1(16.0)	spm2	MNI	3.0T	6	uncorrected,P<0.05
MDD_Kandilarova2019	MDD	DSM-IV-ТR	39	10/29	47.7(13.9)	129.6(106.7)	42	13/29	42.6(13.7)	spm12	MNI	3.0T	8	FDR,p<0.05
MDD_Kong2014a	nMDD	DSM-IV	28	11/17	34.42(8.24)	2.11(0.9)	28	14/14	32.07(9.27)	spm8	MNI	1.5T	8	FDR,p<0.05
MDD_Kong2014b	tMDD	DSM-IV	24	10/14	36.12(5.73)	4.12(0.89)	28	14/14	32.07(9.27)	spm8	MNI	1.5T	8	FDR,p<0.05
MDD_Lai2015	MDD	DSM-IV	53	25/28	40.07 (8.99)	5.03 (1.62)	54	25/29	40.38 (10.51)	FSL	MNI	3.0T	7.5	FWE,p<0.05
MDD_Leung2009	MDD	/	17	NA	45.5(8.5)	84.0 (49.1)	17	/	45.8(9.8)	spm2	Talairach	1.5T	8	uncorrected,P<0.001
MDD_Li2019	MDD	DSM-IV-TR	56	20/36	35.1 (8.9)	/	56	23/33	30.7 (8.0)	spm12	MNI	3.0T	8	FWE,p<0.01
MDD_Lu2016	MDD	DSM-IV	30	15/15	34(10.75)	/	26	13/13	31.42(6.5)	FSL	MNI	3.0T	7.5	FWE,p<0.05
MDD_Machino2014	MDD	DSM-IV	29	16/13	39.57(8.29)	52.55(57.81)	29	16/13	38.66(8.36)	spm8	MNI	1.5T	8	correct,P<0.05
MDD_Meng2020	MDD	DSM-IV	159	76/83	33.71(10.21)	/	53	27/25	35.64(8.668)	spm8	MNI	3.0T	8	RFT correction was performed to adjust single voxel value at p<0.005, cluster level <0.05, after which p<0.05 was statistically significant.
MDD_Modinos2014	MDD	DSM-IV	23	3/20	44.6(5.5)	/	46	32/14	25.3(4.3)	spm8	MNI	1.5T	8	FWE,p<0.05
MDD_Nakano2014	MDD	DSM-IV-ТR	36	14/22	49.0(11.4)	66.7(80.9)	54	27/27	45.4(16.1)	spm8	MNI	1.5T	8	FWE,P<0.05
MDD_Nan2020	MDD	DSM-IV	166	51/115	33.69(9.99)	/	166	51/115	34.64(10.98)	spm8	MNI	3.0T	8	A significant level of p<0.05 was produced by combining the individual voxel p<0.001 and cluster size >148 voxel.
MDD_Opel2019	MDD	ICD-10	506	198/308	49.14(7.28)	80.71(95.30)	358	180/178	52.57(7.94)	spm12	MNI	3.0T	8	FWE,p<0.05and a cluster-forming threshold of p < 0.001.
MDD_Oudega2014	MDD	DSM-IV	55	19/36	72.3(7.8)	/	23	11/12	70.0(6.3)	spm8	MNI	1.0T	10	uncorrected,P<0.001
MDD_Peng2014a	Depression with Suicide	DSM-IV	20	7/13	27.75(7.21)	21.46(21.27)	28	15/13	28.61(5.45)	spm8	MNI	3.0T	8	FDR,p<0.05
MDD_Peng2014b	Depression without Suicide	DSM-IV	18	6/12	31.06(7.39)	23.45(20.14)	28	15/13	28.61(5.45)	spm8	MNI	3.0T	8	FDR,p<0.05
MDD_Qiu2016	MDD	(DSM)-IV	12	4/8	34.4(10.1)	/	15	5/10	33.7(9.9)	spm8	MNI	3.0T	8	uncorrected,P<0.001
MDD_Ribeiz2013	MDD	DSM-IV	30	7/23	70.73(6.59)	/	22	5/17	70.41(7.58)	spm8	Talairach	1.5T	10	p-FWEcorr<=0.001
MDD_Salvadore2011a	dMDD(currently-depressed participants)	DSM-IV	58	21/37	38.8(11.1)	220.8	107	47/60	36.2(10.3)	spm5	Talairach	3.0T	10	uncorrected,P<0.05
MDD_Salvadore2011b	rMDD(currently-remitted)	DSM-IV	27	6/21	40.2	181.2	107	47/60	36.2	spm5	Talairach	3.0T	10	uncorrected,P<0.05
MDD_Serra-Blasco2013a.	MDD(treatment-resistant)	DSM-IV	22	4/18	49(8)	/	32	9/23	46(8.3)	spm8	MNI	3.0T	8	corrected,P<0.05
MDD_Serra-Blasco2013b	MDD(first-episode)	DSM-IV	22	7/15	44(6.5)	/	32	9/23	46(8.3)	spm8	MNI	3.0T	8	corrected,P<0.05
MDD_Serra-Blasco2013c	MDD(remitted-recurrent)	DSM-IV	22	2/20	48(8.7)	/	32	9/23	46(8.3)	spm8	MNI	3.0T	8	corrected,P<0.05
MDD_Soriano-Mas2011.	MDD	DSM-IV	70	29/41	61.56(9.68)	125.4	40	23/17	59.23(7.09)	spm2	MNI	1.5T	12	/
MDD_Sprengelmeyer2011	MDD	DSM-IV	17	8/9	45.6(12.3)	/	21	9/12	42(12.9)	spm5	MNI	1.5T	8	p<0.05，corrected
MDD_Smith2009	MDD	DSM-IV	16	6/10	65.3(9.1)	/	13	5/8	67.4(7.4)	spm5	MNI	1.5T	8	P<0.001;uncorrected for multiple independent comparisons
MDD_Soriano-Mas2011.	MDD	DSM-IV	70	29/41	61.56(9.68)	125.4	40	23/17	59.23(7.09)	spm2	MNI	1.5T	12	/
MDD_Vasic2015	MDD	DSM-IV(SCID)	43	17/26	37.1(10.9)	86.4	29	11/18	34.5(10.7).	spm8	MNI	3.0T	10	uncorrected height threshold of p < 0.005 together with an extent threshold of p < 0.05.
MDD_Wang2012	MDD	DSM-IV	18	9/9	34(13)	5(4)	18	9/9	35(12)	spm5	MNI	3.0T	4	p<0.05(corrected)
MDD_Wang2014	MDD	DSM-IV	13	0/13	30.9(9.1)	/	10	0/10	29.8(7.5)	spm8	MNI	3.0T	6	The significance level for each group was set at p<0.05 using the AlphaSim correction (a combination of threshold of p<0.001 and a minimum cluster size of 12 voxels).
MDD_Wang2016	MDD	DSM-IV	25	14/11	32.11(11.25)	8.4(2.4)	35	19/16	33.28(8.83)	spm8	NA	3.0T	6	(FDR)corrected p < 0.05
MDD_Wang2020	MDD(unipolar depression)	DSM-IV	36	16/20	34.11(10.39)	/	27	13/14	32.44(8.57)	spm8	NA	3.0T	8	p<0.001，corrected
MDD_Watanabe2015	MDD	DSM-IV	29	16/13	/	/	45	33/12	/	spm8	Talairach	3.0T	8	(FDR)corrected p < 0.05
MDD_Yang2015	MDD	DSM-IV	51	20/31	30.98(9.452)	9.71(12.50)	51	20/31	31.14(9.287)	spm8	MNI	3.0T	6	P<0.001;uncorrected for multiple independent comparisons
MDD_Yang2017	MDD	DSM-IV	35	0/35	44.54(11.15)	/	23	0/23	39.09(14.35)	spm8	MNI	3.0T	8	P<0.005,corrected
MDD_Yuan2008	MDD	DSM-IV	19	9/10	67.1(7.2)	44.4	16	8/8	67.7(3.8)	spm5	MNI	1.5T	NA	uncorrected,P<0.001
MDD_ZhangYN2021	MDD(unipolar depression)	DSM-IV	20	7/13	28(9.1)	56.4(29.4)	20	10/10	31.7(11.4)	spm8	MNI	NA	8	corrected,P<0.05
MDD_Zhao2017	MDD	DSM-IV	37	25/12	26.7(7.1)	24(6)	41	26/15	27.1(7.2)	spm8	MNI	3.0T	8	P<0.001
MDD_Tsai2022	MDD	DSM-IV-TR	36	8/28	65.6(7.3)	18.2(15.7)	17	8/9	64.1(7.9)	spm12	MNI	3.0T	8	(FDR)corrected p < 0.05
MDD_Liu2022	MDD	DSM-IV	64	27/37	28.47(9.74)	15.20(23.85)	61	36/25	30.49(9.55)	spm8	MNI	3.0T	8	uncorrected,P<0.001
MDD_Lu2022a	MDD	DSM-IV (SCID)	22	5/17	28.6(7.73)	23.4(27.5)	20	10/10	27.7(5.07)	spm12	MNI	3.0T	8	(GRF)corrected,P<0.05
MDD_Lu2022b	MDD	DSM-IV (SCID)	20	10/10	29.1	19.9	20	10/10	27.7	spm12	MNI	3.0T	8	/
MDD_Wang2023a	MDD	DSM-IV	1082	404/678	37.23(14.2)	38.34(61.51)	990	410/580	37.45(15.67)	spm8	MNI	NA	8	corrected,P<0.05
MDD_Wang2023b	MDD	DSM-5	26	9/17	26.81(8.24)	5.11(3.62)	31	11/20	28.72(9.03)	spm8	MNI	3.0T	8	(FDR)corrected p < 0.05
MDD_Yang2022	MDD	DSM-IV	85	34/51	32.44(8.79)	40.81(55.87)	95	47/48	30.21(6.85)	spm12	MNI	3.0T	6	p<0.01
MDD_Zou2010	MDD	DSM-IV	23	10/13	31.1	/	23	10/13	36.6	spm2	Talairach	3.0T	/	corrected,P<0.05
MDD_Kang2022	MDD with NSSI	/	77	15/62	22.09(4.16)	/	111	24/87	26.01(7.41)	spm8	MNI	3.0T	8	FWE,p<0.05
MDD_zhang2022	MDD	DSM-5	56	15/41	36.4(16)	/	35	13/22	39.4(14.8)	spm12	MNI	3.0T	6	FWE,P<0.05
MDD_Zhang2009	MDD	DSM-IV	15	10/5	33.5(10.2)	123.6(57.6)	15	10/5	33.4(10.2)	spm2	NA	3.0T	/	/
MDD_Zhao2021	MDD	DSM-IV (SCID)	104	50/54	30.5(8.7)	/	75	31/44	31.4(7.8)	spm8	MNI	NA	8	FWE,p<0.05
MDD_Juan2024a	anxious depression	(DSM-V)	83	33/50	34.7±10.45	/	62	28/34	32.92±9.87	spm12	MNI	3.0T	8	GRF,at voxel p<0.001, cluster p<0.05,
MDD_Juan2024b	non anxious depression	(DSM-V)	70	33/37	31.67±9.65	/	62	28/34	32.92±9.87	spm12	MNI	3.0T	8	GRF,at voxel p<0.001, cluster p<0.05,
Reference
Abe, O., et al. (2010). "Voxel-based analyses of gray/white matter volume and diffusion tensor data in major depression." Psychiatry Res 181(1): 64-70.
Arnone, D., et al. (2013). "State-dependent changes in hippocampal grey matter in depression." Mol Psychiatry 18(12): 1265-1272.
Bergouignan, L., et al. (2009). "Can voxel based morphometry, manual segmentation and automated segmentation equally detect hippocampal volume differences in acute depression?" Neuroimage 45(1): 29-37.
Cai, Y., et al. (2015). "Grey matter volume abnormalities in patients with bipolar I depressive disorder and unipolar depressive disorder: a voxel-based morphometry study." Neurosci Bull 31(1): 4-12.
Chen, L., et al. (2018). "Common and distinct abnormal frontal-limbic system structural and functional patterns in patients with major depression and bipolar disorder." Neuroimage Clin 20: 42-50.
Cheng, Y. Q., et al. (2010). "Brain volume alteration and the correlations with the clinical characteristics in drug-naïve first-episode MDD patients: a voxel-based morphometry study." Neurosci Lett 480(1): 30-34.
Dannlowski, U., et al. (2015). "NCAN Cross-Disorder Risk Variant Is Associated With Limbic Gray Matter Deficits in Healthy Subjects and Major Depression." Neuropsychopharmacology 40(11): 2510-2516.
Fang, J., et al. (2015). "Functional and Anatomical Brain Abnormalities and Effects of Antidepressant in Major Depressive Disorder: Combined Application of Voxel-Based Morphometry and Amplitude of Frequency Fluctuation in Resting State." J Comput Assist Tomogr 39(5): 766-773.
Grieve, S. M., et al. (2013). "Widespread reductions in gray matter volume in depression." Neuroimage Clin 3: 332-339.
Guo, W., et al. (2014). "Functional and anatomical brain deficits in drug-naive major depressive disorder." Prog Neuropsychopharmacol Biol Psychiatry 54: 1-6.
Harada, K., et al. (2016). "Disrupted orbitomedial prefrontal limbic network in individuals with later-life depression." J Affect Disord 204: 112-119.
Hwang, J. P., et al. (2010). "Cortical and subcortical abnormalities in late-onset depression with history of suicide attempts investigated with MRI and voxel-based morphometry." J Geriatr Psychiatry Neurol 23(3): 171-184.
Jia, Z., et al. (2010). "High-field magnetic resonance imaging of suicidality in patients with major depressive disorder." Am J Psychiatry 167(11): 1381-1390.
Juan, Q., et al. (2024). "Brain structural and functional abnormalities in affective network are associated with anxious depression." Bmc Psychiatry 24(1): 533.
Kandilarova, S., et al. (2019). "Reduced grey matter volume in frontal and temporal areas in depression: contributions from voxel-based morphometry study." Acta Neuropsychiatr 31(5): 252-257.
Kang, L., et al. (2022). "Superior temporal gyrus and cerebellar loops predict nonsuicidal self-injury in major depressive disorder patients by multimodal neuroimaging." Transl Psychiatry 12(1): 474.
Kong, L., et al. (2014). "Frontal-subcortical volumetric deficits in single episode, medication-naïve depressed patients and the effects of 8 weeks fluoxetine treatment: a VBM-DARTEL study." Plos One 9(1): e79055.
Lai, C. H. and Y. T. Wu (2015). "The gray matter alterations in major depressive disorder and panic disorder: Putative differences in the pathogenesis." J Affect Disord 186: 1-6.
Leung, K. K., et al. (2009). "Neural correlates of attention biases of people with major depressive disorder: a voxel-based morphometric study." Psychol Med 39(7): 1097-1106.
Li, Y. T., et al. (2019). "Hippocampus-driving progressive structural alterations in medication-naive major depressive disorder." Journal of Affective Disorders 256: 148-155.
Liu, Y. H., et al. (2022). "Abnormal brain gray matter volume in patients with major depressive disorder: Associated with childhood trauma? (vol 308, pg 562, 2022)." Journal of Affective Disorders 310: 493-493.
Lu, S., et al. (2022). "Increased plasma levels of IL-6 are associated with striatal structural atrophy in major depressive disorder patients with anhedonia." Front Psychiatry 13: 1016735.
Lu, Y., et al. (2016). "The volumetric and shape changes of the putamen and thalamus in first episode, untreated major depressive disorder." Neuroimage Clin 11: 658-666.
Machino, A., et al. (2014). "Possible involvement of rumination in gray matter abnormalities in persistent symptoms of major depression: an exploratory magnetic resonance imaging voxel-based morphometry study." J Affect Disord 168: 229-235.
Meng, Q., et al. (2020). "Brain Imaging Study on the Pathogenesis of Depression & Therapeutic Effect of Selective Serotonin Reuptake Inhibitors." Psychiatry Investig 17(7): 688-694.
Modinos, G., et al. (2014). "Are we really mapping psychosis risk? Neuroanatomical signature of affective disorders in subjects at ultra high risk." Psychol Med 44(16): 3491-3501.
Nakano, M., et al. (2014). "Gray matter volume and rapid decision-making in major depressive disorder." Prog Neuropsychopharmacol Biol Psychiatry 48: 51-56.
Nan, D., et al. (2020). "Association of a SIRT1 polymorphism with changes of gray matter volume in patients with first-episode medication-naïve major depression." Psychiatry Res Neuroimaging 301: 111101.
Opel, N., et al. (2019). "Large-scale evidence for an association between low-grade peripheral inflammation and brain structural alterations in major depression in the BiDirect study." J Psychiatry Neurosci 44(6): 423-431.
Oudega, M. L., et al. (2014). "The structure of the geriatric depressed brain and response to electroconvulsive therapy." Psychiatry Res 222(1-2): 1-9.
Peng, H., et al. (2014). "Increased suicide attempts in young depressed patients with abnormal temporal-parietal-limbic gray matter volume." J Affect Disord 165: 69-73.
Qiu, H., et al. (2016). "Electroconvulsive Therapy-Induced Brain Structural and Functional Changes in Major Depressive Disorders: A Longitudinal Study." Med Sci Monit 22: 4577-4586.
Ribeiz, S. R. I., et al. (2013). "Structural Brain Changes as Biomarkers and Outcome Predictors in Patients with Late-Life Depression: A CrossSectional and Prospective Study." Plos One 8(11).
Salvadore, G., et al. (2011). "Prefrontal cortical abnormalities in currently depressed versus currently remitted patients with major depressive disorder." Neuroimage 54(4): 2643-2651.
Serra-Blasco, M., et al. (2013). "Effects of illness duration and treatment resistance on grey matter abnormalities in major depression." Br J Psychiatry 202: 434-440.
Smith, G. S., et al. (2009). "The functional neuroanatomy of geriatric depression." Int J Geriatr Psychiatry 24(8): 798-808.
Soriano-Mas, C., et al. (2011). "Cross-sectional and longitudinal assessment of structural brain alterations in melancholic depression." Biol Psychiatry 69(4): 318-325.
Sprengelmeyer, R., et al. (2011). "The insular cortex and the neuroanatomy of major depression." J Affect Disord 133(1-2): 120-127.
Tsai, C. F., et al. (2022). "Differences in gut microbiota correlate with symptoms and regional brain volumes in patients with late-life depression." Front Aging Neurosci 14: 885393.
Vasic, N., et al. (2015). "Baseline brain perfusion and brain structure in patients with major depression: a multimodal magnetic resonance imaging study." J Psychiatry Neurosci 40(6): 412-421.
Wang, J., et al. (2020). "Specific Gray Matter Volume Changes of the Brain in Unipolar and Bipolar Depression." Front Hum Neurosci 14: 592419.
Wang, K., et al. (2023). "Brain structural abnormalities in adult major depressive disorder revealed by voxel- and source-based morphometry: evidence from the REST-meta-MDD Consortium." Psychol Med 53(8): 3672-3682.
Wang, L., et al. (2012). "Amplitude of low-frequency oscillations in first-episode, treatment-naive patients with major depressive disorder: a resting-state functional MRI study." Plos One 7(10): e48658.
Wang, L., et al. (2014). "Cerebral anatomical changes in female asthma patients with and without depression compared to healthy controls and patients with depression." J Asthma 51(9): 927-933.
Wang, Y., et al. (2023). "Down-regulated miR-16-2 in peripheral blood is positively correlated with decreased bilateral insula volume in patients with major depressive disorder." J Affect Disord 338: 137-143.
Wang, Y. L., et al. (2016). "Altered functional interaction hub between affective network and cognitive control network in patients with major depressive disorder." Behav Brain Res 298(Pt B): 301-309.
Watanabe, K., et al. (2015). "Relationship between the catechol-O-methyl transferase Val108/158Met genotype and brain volume in treatment-naive major depressive disorder: Voxel-based morphometry analysis." Psychiatry Res 233(3): 481-487.
Yang, J., et al. (2017). "Amygdala Atrophy and Its Functional Disconnection with the Cortico-Striatal-Pallidal-Thalamic Circuit in Major Depressive Disorder in Females." Plos One 12(1): e0168239.
Yang, X., et al. (2015). "Gray matter volume abnormalities were associated with sustained attention in unmedicated major depression." Compr Psychiatry 63: 71-79.
Yang, Y., et al. (2022). "Reduced Gray Matter Volume in Orbitofrontal Cortex Across Schizophrenia, Major Depressive Disorder, and Bipolar Disorder: A Comparative Imaging Study." Front Neurosci 16: 919272.
Yuan, Y., et al. (2008). "Regional gray matter changes are associated with cognitive deficits in remitted geriatric depression: an optimized voxel-based morphometry study." Biol Psychiatry 64(6): 541-544.
Zhang, T. J., et al. (2009). "Magnetization transfer imaging reveals the brain deficit in patients with treatment-refractory depression." J Affect Disord 117(3): 157-161.
Zhang, Y., et al. (2022). "Microstructural deficits of the thalamus in major depressive disorder." Brain Commun 4(5): fcac236.
Zhang, Y. N., et al. (2021). "Healthy individuals vs patients with bipolar or unipolar depression in gray matter volume." World J Clin Cases 9(6): 1304-1317.
Zhao, S., et al. (2021). "The Correlation Between Thyroid Function, Frontal Gray Matter, and Executive Function in Patients With Major Depressive Disorder." Front Endocrinol (Lausanne) 12: 779693.
Zhao, Y., et al. (2017). "Gray Matter Abnormalities in Non-comorbid Medication-naive Patients with Major Depressive Disorder or Social Anxiety Disorder." Ebiomedicine 21: 228-235.
Zou, K., et al. (2010). "Changes of brain morphometry in first-episode, drug-naïve, non-late-life adult patients with major depression: an optimized voxel-based morphometry study." Biol Psychiatry 67(2): 186-188.

## Sheet: Table S3
Table S3.Meta-analysis results on the subgroup of MRI with 3.0T filed studies.
Brain region	SDM-Z	P value	peak MNI coordinates			Cluster size (voxels)	Heterogeneity test		Egger's test
			x	y	z		Q (P value)	I² (%)	P value
MDD < HCs
Left superior temporal gyrus	-5.362	~0	-50	4	-2	1624	31.786(0.996)	0.554	0.773
Right median cingulate / paracingulate gyr	-4.761	~0	8	-16	44	1580	38.454(0.965)	15.546	0.728
Right superior temporal gyrus	-4.05	2e-05	56	-12	-10	795	30.315(0.998)	0.007	0.897
Medial prefrontal cortex	-3.667	0.00012	2	24	-16	376	31.93(0.996)	5.122	0.73
Left caudate nucleus	-2.824	0.00237	-10	8	18	153	48.6(0.748)	24.535	0.452
Abbreviations: HCs, healthy controls; MDD, major depressive disorder; MNI, Montreal Neurological Institute; Q, Cochran’s Q statistic; SDM, seed-based d mapping.

## Sheet: Table S4
Table S4.Meta-analysis results on the subgroup of FWHM with 8mm filed studies.
Brain region	SDM-Z	P value	peak MNI coordinates			Cluster size (voxels)	Heterogeneity test		Egger's test
			x	y	z		Q (P value)	I² (%)	P value
MDD < HCs
Left insula	-4.565	~0	-44	2	-6	2339	30.003(0.998)	1.074	0.657
Corpus callosum	-3.946	4e-05	58	-16	2	1215	33.087(0.994)	0.792	0.947
Left superior frontal gyrus, medial	-2.79	0.00263	2	52	20	284	37.897(0.970)	20.095	0.736
Left cerebellum, hemispheric lobule VI	-2.716	0.00331	-6	-64	-8	192	44.788( 0.859)	30.508	0.527
Abbreviations: HCs, healthy controls; MDD, major depressive disorder; MNI, Montreal Neurological Institute; Q, Cochran’s Q statistic; SDM, seed-based d mapping.

## Sheet: Table S5
Table S5.Gray matter volume alterations in MDD .
Brain regions	SDM-Z	p value	Peak MNI coordinates			Cluster size	Heterogeneity test		Egger’s test
			x	y	z	(voxels)	Q (p value)	I2 (%)	p value
MDD < HCs
Left insula/Left superior temporal gyrus/Left inferior frontal gyrus	-7.376	0.001	-48	4	-4	1721	37.444(0.988)	0.89	0.738
Abbreviations: HCs, healthy controls; MDD, major depressive disorder; MNI, Montreal Neurological Institute; Q, Cochran’s Q statistic; SDM, seed-based d mapping.

## Sheet: Table S6
Table S6.Results of Meta-regression results in MDD
Variable	Brain region	MNI coordinate	SDM-Z	P-value	Voxels
MDD
Mean age	Anterior Cingulate Cortex	2,30,26	3.727	0.001	486
Illness dureation	Left Ventral Insular Cortex	-18,4,-12	2.642	0.008	190
Abbreviations: MDD, major depressive disorder; MNI, Montreal Neurological Institute; SDM, seed-based d mapping.

## Sheet: Table S7
Table S7.PLS1+ set with significantly positive z scores derived from PLS regression.
PLS1+ genes	z scores
SCN1B	15.516
TRPC3	14.4446
SHD	14.145
RHBDL3	13.8475
MAGI2-AS3	13.7394
ESRRG	13.4999
EIF5A2	13.4208
SCN1A	13.3898
THAP10	13.3117
GPAT3	13.1317
ALDH1A3	13.0033
HR	12.9428
FASTKD1	12.9011
ANK1	12.8093
EEPD1	12.6708
PVALB	12.5835
SLC38A2	12.531
SEMA7A	12.5239
SLC24A2	12.4593
SERTAD4-AS1	12.3513
SCRT1	12.1511
CELF2	11.9853
HAPLN4	11.9815
CDR2L	11.8981
PPARGC1A	11.8435
TCTEX1D1	11.841
ASB13	11.8266
EYA4	11.7083
NCOA3	11.6487
CKMT1B	11.5248
GPCPD1	11.4992
LAPTM4B	11.3872
SPTSSB	11.3036
KCNAB3	11.3019
DMKN	11.2303
PLXDC1	11.23
CDS1	11.1697
SLC16A6	11.166
MIR29B2CHG	11.1522
VAV3	11.1484
KCNC1	11.0844
UPP1	11.0027
LYPD5	10.9671
RORA	10.9059
KLF9	10.8656
VAMP1	10.8474
FLT3	10.7407
RAD54B	10.6031
PLEKHH3	10.6024
FAM20A	10.5892
ADAM23	10.5831
KCNA2	10.5802
NEFH	10.5628
RCC2	10.4935
TCF7L2	10.3834
IDI2-AS1	10.3778
C4orf33	10.3528
DCBLD2	10.3484
KLF12	10.2493
SETD7	10.2483
CPLX1	10.238
MINDY3	10.237
RET	10.2149
HSD11B1	10.2098
MPC1	10.209
RAB37	10.1939
MYH7B	9.97562
BEND6	9.96304
EXTL2	9.95581
FAM216A	9.92892
PLCB4	9.91324
LINC01637	9.88616
SYT2	9.86585
URM1	9.86426
C1RL	9.81561
ACAN	9.81092
KCTD9	9.79543
NEXN	9.76808
LYSMD4	9.73154
TMTC4	9.71727
BHLHE40	9.71392
KCNH6	9.71208
ANKRD34C	9.69105
NR3C1	9.64028
ZMAT4	9.63979
STS	9.63767
RHOBTB2	9.6139
ETV6	9.59182
P2RX6	9.58703
RSRC1	9.54762
ENTPD4	9.53613
FDX1	9.53149
LRRC37A4P	9.529
PTPRD-AS1	9.52134
TIFA	9.51496
GPR161	9.49639
IPW	9.47501
KALRN	9.40439
ZDHHC2	9.32129
PAG1	9.32039
FBXO33	9.31814
FGF9	9.31421
MCF2	9.30873
PFKFB2	9.29311
TOX2	9.28741
RFPL2	9.28243
USP45	9.27209
SDSL	9.24551
SLC16A7	9.23426
LRCH1	9.20854
PPTC7	9.17689
THSD4	9.17565
IFNLR1	9.16713
ANKS6	9.12966
JDP2	9.12541
PCP4	9.10773
SH3BGRL	9.09837
RELL2	9.08447
RPGR	9.05177
EFR3A	9.04725
EPN3	9.01552
FBXO32	8.9975
MAP3K6	8.96327
KCNC3	8.93921
SLC38A1	8.90825
CLMN	8.89353
C6orf47	8.89296
TTC39A	8.87911
LRPAP1	8.87584
PHYH	8.87575
HS3ST1	8.86007
FAM71E1	8.85627
NR3C2	8.833
CTSC	8.82307
MED11	8.81656
ABCA6	8.80566
ZBTB1	8.79107
CYB5R4	8.78333
C17orf75	8.76428
NT5M	8.76192
SERTAD4	8.74868
DEPTOR	8.74532
PIP4P2	8.74048
NEFM	8.7343
GAS2	8.69011
RNF157	8.66173
BCAT1	8.63758
GLIPR1	8.63327
ACSL6	8.62865
RIMKLA	8.62747
RILP	8.60684
DNAJC4	8.59639
SLC39A14	8.58957
HCN2	8.58594
CAST	8.58041
CMYA5	8.54476
ST8SIA1	8.54274
ESRRA	8.5214
CEP85L	8.50838
TRMT9B	8.503
LRRC49	8.50235
FGF13	8.49462
NXPE3	8.4907
ANKRD29	8.48082
IMPAD1	8.45722
CACNA2D2	8.45258
PLAGL1	8.45059
NAPEPLD	8.44969
CLGN	8.4401
ACVR1C	8.42781
SORL1	8.42268
TFAM	8.41934
DND1	8.3953
SLC39A13	8.38733
HECA	8.37663
CNDP1	8.37097
KCNA1	8.35847
STAG3L4	8.35753
GNAS	8.35402
SKIDA1	8.32385
ERMP1	8.29788
SLCO4A1	8.26613
TUBD1	8.26162
NAT8L	8.25991
EIF4E2	8.25535
HES6	8.2439
NIPAL2	8.22892
NCALD	8.21949
GPR158	8.21538
MIR600HG	8.21407
ZNF365	8.19866
PLCL1	8.17547
IFFO1	8.15053
UST	8.13633
COX7A1	8.09774
MAGEL2	8.08114
SV2C	8.0784
SUSD5	8.05103
ZBTB21	8.03607
STPG1	8.00829
PCSK1	7.98146
CLEC16A	7.97874
CSDC2	7.94699
TANC1	7.93577
STRN	7.92997
ANO5	7.92507
SYCP2	7.92
NFIC	7.91289
SLC35A4	7.91011
PEG3	7.90717
DENND1B	7.90311
ELOVL4	7.90267
SRXN1	7.89571
NT5DC1	7.89383
CCNI	7.89317
LCA5	7.87785
SLC25A17	7.87696
AGO1	7.875
ZADH2	7.8723
CCDC39	7.86114
LAG3	7.85933
PPP1CC	7.8545
OSBPL6	7.84946
MIR124-2HG	7.84089
PDCL3	7.83896
SCLT1	7.81103
TBCE	7.80898
SYNE4	7.80777
SDHAF2	7.80719
PRO1804	7.80155
SLC5A6	7.79218
NKX1-2	7.77733
FNDC5	7.76985
CAB39	7.75527
PDE4A	7.75035
STK26	7.75021
ST3GAL6	7.74491
ADM	7.73728
FAM110A	7.71444
TBC1D4	7.70799
ONECUT2	7.70377
KREMEN1	7.69266
CORO6	7.6861
HIBADH	7.68548
FRAT1	7.67995
STRBP	7.67899
RORB	7.67477
PRIM1	7.67253
TBK1	7.67184
CITED2	7.67069
MPP1	7.66392
TAS2R14	7.65075
DEXI	7.64489
OGDHL	7.64384
CRABP1	7.62705
BHLHE41	7.62357
KLHL24	7.61708
EPB41	7.59599
FIGN	7.57661
FSTL1	7.57142
WDYHV1	7.56735
MROH5	7.55329
STAT4	7.54411
EPB41L3	7.53818
SACM1L	7.53757
RICTOR	7.52023
B4GALT6	7.50855
FER1L4	7.50411
ARID4B	7.49558
ZBTB16	7.49131
SMCO4	7.48401
ANO4	7.48109
MYOZ3	7.47904
USP13	7.47461
SAP30L	7.46442
IGSF1	7.45952
FBXL4	7.45826
GPLD1	7.43501
ANKH	7.43375
TMCC2	7.43351
SLC8A1	7.43168
COQ3	7.42985
MMP15	7.4244
ATP1B1	7.4211
TGFBR1	7.42074
LUZP1	7.41753
SPECC1	7.41132
HEXIM1	7.40787
AMPD3	7.4043
SLC17A6	7.40088
ELMO3	7.40069
NUDT22	7.36764
NARS	7.36204
CHGA	7.34243
CTIF	7.34022
SLC38A11	7.33641
POU6F2	7.32474
TNKS	7.31993
AIFM3	7.29284
RGS7	7.28684
INA	7.27144
SEC14L5	7.2713
TMEM69	7.26358
GALR1	7.26071
ATP1A4	7.25771
SRA1	7.25711
DIS3L2	7.2511
FNDC4	7.25088
SEMA6D	7.23961
TRNP1	7.23536
ZSCAN9	7.22121
PDCL3P4	7.21276
XKR6	7.21185
EIF4G2	7.19855
SPART	7.19138
RBBP4	7.17593
PLEKHF1	7.1715
ITPR1	7.15748
RASSF4	7.15404
ZBED5	7.14423
ATRNL1	7.14252
RASD2	7.13553
ZBTB34	7.12631
ASTN2	7.1217
MID2	7.10855
REPIN1	7.10639
CHD6	7.10524
PLA2G5	7.10063
PLA2R1	7.09796
TTC39B	7.08836
LRPPRC	7.08619
OSBPL5	7.08226
DLL1	7.07314
RWDD2B	7.07247
GUCA2B	7.06943
ZNF280D	7.05528
APOL2	7.0518
CLEC2L	7.04507
USP31	7.04028
NEB	7.03844
TRIP11	7.03396
MAT2B	7.02226
NFKB1	7.02054
GAPVD1	7.01779
ZYX	7.0132
CTSZ	7.01276
ZIC1	7.01045
DOK3	6.98474
HS6ST2	6.98217
FGF18	6.97647
FAM214A	6.97413
GDPD1	6.96212
HSBP1L1	6.95816
HSPA4L	6.95414
LURAP1L	6.95234
HMBS	6.92627
MYC	6.92364
DCUN1D2	6.91897
MAP3K13	6.91453
DPY19L4	6.91017
NR2C1	6.90428
ZNF630	6.90036
VWC2	6.89907
PRAG1	6.89125
IL1RAP	6.889
IFIT5	6.87806
FES	6.87611
ABTB2	6.87229
RAB3GAP2	6.87086
CIT	6.85634
LINC00515	6.85229
CDYL	6.83343
TRIM37	6.83214
G0S2	6.827
SLC25A5	6.82424
CORO2A	6.81681
OXNAD1	6.81548
PELI3	6.81493
SPHK2	6.81222
SNHG1	6.8099
PAQR8	6.80966
TMEM237	6.80698
TRIM44	6.80031
STAU2	6.79783
SDR16C5	6.79532
KCNA3	6.79219
EDNRA	6.7772
SLC45A4	6.77657
FLJ23867	6.76845
C9orf72	6.76066
NUDT12	6.76032
SLC19A2	6.75877
AZGP1	6.75799
OSBP2	6.75432
CPPED1	6.75342
RBMS1	6.75008
SLC38A9	6.74203
POU6F1	6.72676
MCF2L	6.71806
ECM1	6.71559
ACER3	6.70791
DHX35	6.70439
OIP5-AS1	6.69323
TBC1D19	6.69195
ZNF124	6.68818
INPP5F	6.68727
PSMD12	6.68073
STARD9	6.66561
HS3ST5	6.65951
ACYP2	6.65096
BTBD11	6.65027
BBS7	6.65016
FRMD5	6.64613
VWA8	6.64506
TBC1D16	6.63704
SLC47A1	6.634
SERPINB9	6.62987
REPS1	6.62265
CASP8AP2	6.59696
FAM210B	6.58735
PNKD	6.57399
DNAAF2	6.57068
ITM2A	6.56726
FMR1	6.55715
CACNB4	6.55399
COG2	6.55176
GTF2H2B	6.5454
TOR1AIP2	6.5453
NGLY1	6.53908
IMPA1	6.53785
PNLDC1	6.53334
SNRNP35	6.53164
CPXM2	6.51855
LGI3	6.51397
SMARCD2	6.51142
JADE1	6.50524
GRIN2A	6.5004
MKNK2	6.49761
KDF1	6.48552
MARF1	6.47807
ACSL3	6.47037
PLEKHG1	6.46957
SSH3	6.46832
PTPN4	6.46391
TTC21B	6.46377
2024-09-04	6.4622
PARM1	6.45265
PNPT1	6.43465
KIT	6.43405
MAP9	6.42541
PPM1B	6.42006
SMIM3	6.41908
CDK14	6.41673
TRPM3	6.39555
INPP5A	6.39469
EMB	6.3934
ERRFI1	6.39087
PLCB1	6.38598
NUDT5	6.38472
MTFP1	6.38389
KBTBD3	6.37378
RGS6	6.37146
RERGL	6.36649
RGS16	6.35848
C4orf3	6.3536
TAF12	6.32447
USP16	6.31857
ZNF641	6.31744
ZNF385A	6.30869
CFL2	6.30005
PLCD4	6.29483
TMEM229A	6.29287
SPAG4	6.29215
TRPT1	6.28609
GPR137C	6.28126
ESYT1	6.27987
FAM182B	6.27643
ENPP5	6.27033
ANKRD2	6.26222
SAR1B	6.25282
MRPL16	6.25207
OPN3	6.24731
RASGRF1	6.24558
ADAMTS5	6.24464
JAK1	6.24405
NRG1	6.24145
KRIT1	6.23984
KCNJ14	6.23573
CAMTA1	6.2324
UVRAG	6.20833
MOCS1	6.20143
NAP1L1	6.19547
PDS5B	6.19334
CD99L2	6.18955
GLS2	6.18924
ERCC4	6.1892
KIAA1107	6.18113
TMEM14C	6.17972
CDC42EP3	6.17838
LINC01137	6.17527
SYT15	6.17315
ARID2	6.16001
MTO1	6.15514
TFB2M	6.14975
RALGAPA2	6.14905
LINC00266-1	6.14444
ZNF487	6.14202
ZNF718	6.13884
MTDH	6.1386
TAF2	6.1329
GPR108	6.12932
PINX1	6.127
MYO15A	6.12066
MOGAT1	6.11645
ADSSL1	6.11185
PHKA2	6.11045
CRISPLD1	6.11029
THEMIS2	6.11008
SDHA	6.1076
ZNF284	6.10751
CCDC146	6.09737
HSPB8	6.09632
MRPL47	6.09479
POMT2	6.08732
L2HGDH	6.08571
ODF2	6.07803
RWDD1	6.07742
ZNF223	6.06515
INTS8	6.05453
SUMF2	6.0521
MAPK10	6.04893
CLK3	6.04741
RRM2B	6.04439
DSCC1	6.02918
SPSB1	6.02216
OR7E47P	6.02053
RRNAD1	6.02011
GLRB	6.01738
SHMT1	6.01532
NTN4	6.01473
MAP4K2	6.01112
ZCCHC8	6.00669
VPS54	6.00596
TIGAR	6.00572
SLC25A12	6.00087
CEP152	5.99231
SNHG14	5.9849
KIAA1324L	5.98486
ATF4	5.98348
LINC00473	5.97202
MGARP	5.97185
TAS2R10	5.97144
PRDM2	5.96984
CHML	5.96977
PEPD	5.96173
ADD1	5.96165
LINC01158	5.95383
MGST2	5.94738
CHI3L1	5.9454
VMP1	5.94219
CA7	5.94113
SMIM13	5.94084
DENND2D	5.94083
HERPUD1	5.94043
MRGPRF	5.93297
ARHGEF10L	5.93244
PRMT7	5.89898
ASCL1	5.89796
CREBRF	5.89451
NEU4	5.89328
CHRNA2	5.88838
SLC14A1	5.885
ELMOD2	5.88493
CCDC25	5.88235
SLC25A37	5.88132
SLC25A15	5.88015
SOCS5	5.87983
PIM3	5.87792
SNCAIP	5.87453
STEAP2	5.87449
ROCK2	5.87426
PIK3CA	5.87212
GRPEL2	5.86735
TRMT10A	5.86674
FRAT2	5.86503
ARMT1	5.86259
FAM162B	5.85578
PMEPA1	5.85207
RNF6	5.84582
NFATC2IP	5.84415
RAB11FIP5	5.84275
ATP1B3	5.84069
MAP1LC3B	5.83998
ITGB1	5.83808
CCDC136	5.82913
HTR1F	5.82105
TMEM132E	5.80908
SPHK1	5.8041
LOC100507642	5.80384
TRIM7	5.79948
IGFBP2	5.79697
CDKN1B	5.79637
CDADC1	5.7936
GLCCI1	5.78814
NTPCR	5.78492
ANKRD20A8P	5.7815
INTS9	5.78149
OSBPL3	5.7796
ZBTB8OS	5.77923
XYLT2	5.77687
LOC220729	5.77516
LPCAT4	5.76655
CRYBA2	5.76479
TTBK2	5.76476
PDP2	5.76372
TMEM87A	5.76034
GLRX2	5.75831
NIPA2	5.75104
PCGF1	5.75034
SGK494	5.74981
OMG	5.7466
TMEM184C	5.74178
ZNF330	5.74164
EPHB6	5.74132
RGL2	5.72934
CHD9	5.7272
GNPAT	5.72617
DPH3	5.72064
ING3	5.71791
PAN2	5.71736
ZDHHC5	5.71532
EXOG	5.71152
SIRT4	5.70483
LRRC8A	5.70455
NR1D2	5.70383
LINC01102	5.69255
RTKN2	5.68537
MSRB3	5.68169
ARMC8	5.68111
ITPK1	5.68098
HLTF	5.68007
SLC2A8	5.68002
STX19	5.67879
GSTT1	5.67783
RMI1	5.67467
NEAT1	5.67462
AKAP12	5.67354
TGM1	5.6719
CDC42BPA	5.66898
TCHP	5.66799
OSBPL1A	5.66786
MON2	5.65961
TDRD6	5.65813
LOC100294145	5.65542
TRMT61B	5.65326
FAM217B	5.65194
METTL18	5.6475
DEFB131A	5.64629
LOC727896	5.64405
LOC729737	5.63771
RAB24	5.63405
FSTL4	5.63403
ADRA1D	5.62774
WASHC4	5.62748
RADIL	5.62255
TSEN2	5.62033
NFIX	5.61676
ARID5B	5.61648
LINC00652	5.6133
PDE10A	5.61232
MTIF2	5.60477
EHBP1	5.59344
LY6D	5.59174
RNLS	5.58736
CEP192	5.58711
MTHFD2	5.58687
FGF7	5.58459
2024-09-06	5.58416
PRSS16	5.57407
GCLM	5.57266
XKR9	5.57171
PLEKHA6	5.57001
SESTD1	5.56788
KCNB1	5.56221
TRIM26	5.5597
PIF1	5.55809
2024-09-12	5.55728
SCAF11	5.55574
TADA2B	5.55514
MAP6D1	5.55037
TFB1M	5.54848
RBKS	5.54515
TEX264	5.54313
ADCY8	5.54092
ATP2B3	5.52921
NDRG3	5.52531
MRS2	5.52332
DNM3	5.51947
ATP5F1B	5.51802
TDRD3	5.51662
LOC441155	5.51645
KLHL20	5.51441
RRP12	5.51389
GZF1	5.51246
MICU3	5.50917
KCNS1	5.50166
IPCEF1	5.49967
YBEY	5.49646
ERICH5	5.494
GABRA1	5.49283
TSHZ1	5.49054
NSRP1	5.48897
USP33	5.48789
KIF9	5.48274
ATXN1	5.48067
OMA1	5.47432
NDUFS1	5.47066
C12orf49	5.46532
TMEM229B	5.46292
MFSD9	5.45707
MBNL2	5.45188
SLC9A1	5.44364
ZFPM2	5.4432
GRIP2	5.43905
ABHD6	5.43781
CERK	5.43621
IDS	5.43602
EML2	5.43443
TDP2	5.43251
CDKL1	5.43037
TMEM81	5.43005
DCP1A	5.42926
ZSCAN29	5.42907
ZNF653	5.42573
SUGP2	5.42449
PCP4L1	5.42276
SRSF1	5.41873
SLC4A8	5.41778
GK	5.41659
USF2	5.41556
EMBP1	5.414
AUH	5.41252
NSUN5	5.40894
DENND4B	5.40642
ATP8B2	5.40006
SRFBP1	5.39907
TIGD3	5.39309
ZNF358	5.39255
FBLN7	5.39203
ITSN2	5.39154
TAS2R30	5.38652
CAPS2	5.3858
DCLRE1A	5.38547
SCN4B	5.38385
VEZF1	5.38377
POPDC3	5.38281
PNISR	5.3819
DACT2	5.38033
DYNC2H1	5.38027
HSD17B4	5.37854
MX1	5.37316
ADAMTSL1	5.3716
TWNK	5.36458
KMT5B	5.36413
TMEM165	5.36121
LYPLA1	5.35329
CDH7	5.35319
FAM222A	5.35233
CPNE9	5.34931
CAMK2G	5.3477
SRPK1	5.34386
MRPL22	5.34206
ATPAF2	5.33965
CCDC184	5.33202
SOAT1	5.33065
CARS	5.32884
ZNF576	5.3224
KIAA1958	5.32023
NUDT6	5.31874
APIP	5.31759
SDHD	5.3174
DENND5B	5.31733
MTPAP	5.3153
CLMP	5.3137
SPOPL	5.31304
ABHD17B	5.3084
QPCT	5.30808
LMLN	5.30783
UBE2QL1	5.30496
SPATA6	5.30487
RPP25	5.30356
SNRK	5.30016
FZD6	5.29565
PARP8	5.29194
ARG2	5.29072
RBM41	5.29065
TMEM35A	5.28857
SMC2	5.28299
MRPL15	5.28271
ZNF493	5.27945
LOC101926935	5.27632
ZFP91	5.27299
SLC12A2	5.27255
ARNTL	5.26779
HOMEZ	5.26428
TARDBP	5.26266
STARD10	5.26043
ENDOD1	5.24266
AK2	5.24244
PPIE	5.23221
FADS6	5.22171
CDKN2A	5.20813
PPA1	5.2025
DHX32	5.19975
METAP2	5.19912
MYO1B	5.19842
SMG9	5.19427
GADD45B	5.1941
NAA16	5.19056
ABCD2	5.18731
PDE4B	5.18712
EMILIN3	5.18593
SLITRK3	5.18501
PACSIN2	5.18438
SORT1	5.17717
DCPS	5.17585
PDPN	5.17116
AARS	5.17072
ZC3H10	5.16819
RNF168	5.16731
SYNDIG1	5.16613
PRKCB	5.16473
NUB1	5.16414
NREP	5.15805
C1orf109	5.15635
GTF3C3	5.15587
ZFHX2	5.15531
ARL5B	5.15398
GREM2	5.15207
TSPAN9	5.14927
CTSK	5.14808
DCLK1	5.14256
SV2A	5.14188
PURA	5.13759
UCHL5	5.1356
WDR33	5.13526
CCNT1	5.13434
POU3F2	5.13163
ZGRF1	5.13157
JAM2	5.13043
AMOTL1	5.12738
NR1D1	5.12478
SLC20A2	5.12385
LDLRAD4	5.123
ST3GAL6-AS1	5.12083
TMEM132C	5.11983
H1F0	5.1151
GPR4	5.11143
MYOT	5.10719
ICA1	5.10687
COL4A4	5.0968
UGCG	5.09501
IQUB	5.09352
PIGC	5.0935
ZNF322	5.09224
PPA2	5.09185
TNIP1	5.09172
BCL3	5.08846
ZMYND8	5.08743
CNKSR3	5.08336
PPIL3	5.07854
GADD45A	5.07812
PTK2B	5.07681
NSG1	5.072
ZNF143	5.07159
PCNA	5.07019
ARHGEF11	5.06684
RASGRP2	5.06554
PPM1A	5.06309
IP6K3	5.06083
MRPL34	5.05728
FAM84A	5.05122
MPZL3	5.04863
MAGED2	5.04585
TIAM1	5.04249
FAM43A	5.04062
SNAPC3	5.03959
LINC01260	5.03883
LOC643406	5.03528
DENND4C	5.02681
C8orf31	5.02312
WWP1	5.02158
LTN1	5.0207
PCDH12	5.01875
KIAA1614	5.01254
FH	5.00939
FAM135B	5.00534
ATP6V0A2	5.00135
DIP2B	4.99766
LARP4	4.99609
LRRC8D	4.99458
B3GNT9	4.99351
CCDC47	4.9935
SPECC1L	4.98909
ZNF250	4.988
RBAK	4.98658
HAT1	4.97745
WDR91	4.97503
MAP3K9	4.97465
IGDCC3	4.97438
RPH3A	4.97388
PRKCA	4.97284
SKA2	4.97218
FAR2	4.97177
GPATCH8	4.97091
MTUS1	4.96841
NCAPD2	4.95703
FEM1C	4.95518
MXI1	4.94937
METTL24	4.94673
DAZAP1	4.94331
FGF12	4.93652
TMEM50B	4.93428
INSR	4.9316
ELMOD3	4.93123
USP8	4.92904
PRH2	4.92736
GGA2	4.92729
RALB	4.92455
ARHGAP9	4.92363
ABCF2	4.92312
FAM35BP	4.91437
VASH2	4.91273
HPN	4.90221
SGIP1	4.90184
AR	4.89999
TXNDC15	4.8998
ATG16L1	4.8987
SZT2	4.89771
CYP20A1	4.89275
PIK3R4	4.89018
UBAP1	4.88908
CASP3	4.88617
KBTBD2	4.88226
CTNNB1	4.87964
FAM222B	4.87488
HCN1	4.87472
TAF4B	4.87392
ZMYM4	4.87167
ATP2B1	4.87008
BRINP1	4.86985
POU3F3	4.86889
EEF2K	4.86753
ELAVL4	4.85971
GALNT12	4.85959
INTS4P1	4.85785
IMPA2	4.85307
ZNF383	4.85258
TIAL1	4.85237
MFSD1	4.8513
ANKRD9	4.85021
GRAMD1B	4.84883
ATP4A	4.84246
PREP	4.83982
CCDC126	4.83867
ZNF165	4.83093
TNRC6A	4.8306
CRY1	4.82696
GABRD	4.82166
ZNF362	4.8203
TIMM21	4.82027
FKBP5	4.81944
ZNF281	4.81838
ANKFY1	4.8181
MAX	4.81448
PCDHB10	4.81335
SCAI	4.80392
PTH1R	4.80355
RND2	4.80155
NIPA1	4.80122
POGLUT1	4.7942
MLYCD	4.79317
STARD5	4.79237
USP6NL	4.78993
ZNF252P	4.78947
EGFR	4.78913
LRRC8C	4.78874
EMSY	4.78657
TMEM38A	4.78238
DDX3X	4.78046
DPY19L2P1	4.7783
INPP5J	4.77805
NUDT8	4.77441
CISD2	4.76729
RANBP17	4.76403
BICD1	4.76273
CS	4.76157
GOLGA6L10	4.75793
JAKMIP3	4.75631
SNAP25	4.75609
LINC00476	4.75577
JMY	4.75401
ANKRD65	4.75401
KCNJ3	4.75335
NAALAD2	4.75326
DNAJC22	4.7516
NFATC3	4.7462
YIPF5	4.74446
NAP1L2	4.74438
CTXN3	4.7427
SLC39A8	4.73984
XBP1	4.73893
FAM78A	4.7378
TAP1	4.73729
FLYWCH1	4.73609
ABTB1	4.73527
MFGE8	4.73371
COL9A3	4.73325
DIRAS1	4.7314
NFYC	4.72855
GUSBP4	4.72602
VEGFC	4.72461
CADM4	4.72045
RCAN2	4.71941
STAMBP	4.7185
DDIT3	4.71446
RALGAPA1	4.70894
CTTNBP2	4.70802
C3orf58	4.70707
TPTE2P6	4.70602
IP6K2	4.70442
ZBTB5	4.70272
SLC25A40	4.70106
ANGPTL2	4.70057
ZFP14	4.69955
HTATIP2	4.69616
MUM1	4.69525
CNST	4.69462
DCAF13P3	4.69373
SMPX	4.68883
PPM1L	4.6884
SLC12A5	4.68807
C9orf3	4.68752
YTHDC1	4.68376
RC3H1	4.68139
PLOD1	4.67897
NOVA1	4.6746
GNPDA2	4.67381
PAQR9	4.67305
CCNB1IP1	4.67301
LINC00889	4.67035
HHIP	4.66436
TIAM2	4.663
KIF25	4.65761
NDUFB5	4.65726
PANK1	4.65699
CENPJ	4.65694
ZC3H11B	4.65406
KLHL15	4.65379
PRPS2	4.65261
N4BP2L2	4.64997
PLPP1	4.6488
NKX3-1	4.64465
TOP1P2	4.64463
PJVK	4.64338
TMEM127	4.64276
FAM133DP	4.6407
WDFY3	4.63999
SLC46A3	4.63686
FUNDC2	4.63231
NUP160	4.63069
UBA3	4.62829
SLC31A2	4.62768
CLOCK	4.62689
CAPN3	4.62409
TRANK1	4.62244
SORBS3	4.61799
OSGEPL1	4.6174
FBN1	4.61677
PDIK1L	4.61406
CNOT6L	4.614
UBL3	4.61257
RAMP3	4.61129
CDK2AP1	4.61103
RELT	4.60858
HSPB6	4.60695
EIF5	4.60512
ABCG4	4.59928
TMX4	4.59741
TRIM35	4.59491
RUNX2	4.59441
KCNK12	4.59219
LIN28B	4.58952
CAMKK2	4.58743
PDP1	4.58555
TBC1D30	4.58289
YARS	4.58164
PPP1CB	4.58125
RABGEF1	4.5803
FOXN3	4.57989
BRSK1	4.57981
GSAP	4.57935
DYNC1LI1	4.5785
FAM43B	4.57544
NAP1L3	4.57483
SNRNP40	4.57351
KITLG	4.57198
INTS12	4.56987
ST13	4.5687
FGFR2	4.568
NFKBIZ	4.56761
FCHO2	4.56551
SNTG1	4.56107
UBXN10	4.55865
KCNS2	4.55782
ASAP2	4.55606
CCDC58	4.55324
RTN2	4.54735
FRMPD4	4.54515
OTULIN	4.5438
RPF2	4.53872
FGD5	4.53736
POLR3D	4.53483
BCO2	4.53354
PDIA5	4.53244
LIN9	4.5296
GALNT6	4.52544
NXPH3	4.52537
ANKRD27	4.52444
SYS1	4.52423
IGIP	4.52393
TFEB	4.52347
INHBA	4.52273
GLRX	4.52228
TAF3	4.52226
PPM1H	4.522
BSDC1	4.51892
UGP2	4.51521
SEC62	4.5151
IDH3G	4.51364
ZFYVE16	4.51336
SNRPA1	4.51304

## Sheet: Table S8
Table S8. PLS1- set with significantly positive z scores derived from PLS regression.
PLS1- genes	z scores
TMEM185A	-4.51296
TMEM132D	-4.51417
ZMYND10	-4.51835
HSD3B7	-4.51867
SMIM24	-4.52013
EDARADD	-4.52022
MOSPD2	-4.52105
NECTIN2	-4.52543
ZDHHC23	-4.52544
MRPS25	-4.52883
KCNN3	-4.5317
NMT1	-4.53272
VPS26B	-4.53282
RUNX1T1	-4.53524
TPI1	-4.53606
MAGED1	-4.53619
CCIN	-4.53707
LINC01664	-4.53765
GGN	-4.54263
FERMT2	-4.54376
B4GAT1	-4.54522
MANF	-4.54753
TDRKH	-4.55013
MT1G	-4.5502
FOXF2	-4.55085
LOC105374546	-4.55657
ITPRIPL2	-4.55768
POLR2G	-4.56125
NDUFS6	-4.56239
DYRK2	-4.56532
ZDHHC24	-4.56731
PUSL1	-4.56771
CCDC148	-4.56973
STAG3	-4.5718
RNF187	-4.57461
FAM207A	-4.57729
METTL9	-4.57996
LINGO3	-4.58109
NEURL3	-4.58125
TMEM43	-4.58158
AGAP2	-4.58374
RAC2	-4.58486
ST6GAL2	-4.58536
NADK2	-4.58821
CYHR1	-4.59038
FAM102B	-4.59433
JADE2	-4.59528
PRR36	-4.59835
CHMP2A	-4.59878
SUMO3	-4.59983
MAPK7	-4.60484
AQP5	-4.60646
SERHL2	-4.6077
FANCG	-4.60828
ZNRF4	-4.61126
TMEM176B	-4.61264
APMAP	-4.61342
CDO1	-4.61578
TP53TG1	-4.6165
ARL15	-4.61774
DCAF4	-4.61978
RGS12	-4.62284
SLC1A4	-4.62397
P2RY12	-4.62398
ADGRG1	-4.62458
PGAP2	-4.62494
PSMD1	-4.62685
CALHM2	-4.62796
PLCE1	-4.62845
ISYNA1	-4.63013
P2RY6	-4.631
ZNF449	-4.63188
STK25	-4.63532
MRPS10	-4.64078
RPS18	-4.64174
AP2A2	-4.64215
NAA38	-4.64302
IGF1	-4.64417
ARX	-4.64881
LOC100130331	-4.64947
PCYOX1L	-4.65099
ZNF521	-4.65258
COL5A3	-4.65355
MAPK8IP1P2	-4.65442
SCAPER	-4.65471
CEP72	-4.65699
KCNT2	-4.6616
JMJD7	-4.66312
ASIC2	-4.66484
WIZ	-4.6666
LSM4	-4.66751
HENMT1	-4.66908
TRH	-4.67245
FTH1	-4.67702
SLC22A9	-4.67708
RASGEF1A	-4.67715
EMC3	-4.67731
PAXIP1-AS1	-4.67812
HHIPL1	-4.67845
SNTB1	-4.6791
LOC105373383	-4.67931
TIMP4	-4.68142
MAPKAPK5-AS1	-4.68255
PCDHGC5	-4.68503
FADS2	-4.68705
MFSD4A	-4.68785
SMARCA1	-4.68951
RAB40B	-4.69143
METTL26	-4.69421
CALML3	-4.69534
BHLHB9	-4.69956
SLC39A10	-4.70032
SNTG2	-4.70057
TAC1	-4.70116
TCTN1	-4.702
GLI1	-4.70259
KCNK2	-4.70729
MT1L	-4.70745
DCAF5	-4.71301
APTX	-4.72161
KDM1B	-4.72319
PCDH8	-4.72345
SPRY1	-4.73055
RAB32	-4.73313
RHEBL1	-4.73359
MGRN1	-4.74517
C8orf58	-4.75116
IL34	-4.75218
TFEC	-4.75506
ICE1	-4.761
GTDC1	-4.76759
STK32C	-4.77008
BRWD1	-4.77324
PUF60	-4.77328
LOC101926934	-4.7753
MYO16	-4.77718
STON2	-4.77749
B4GALT2	-4.78014
WASHC3	-4.78136
ERC2	-4.78571
FKRP	-4.78681
ATP5MF	-4.78846
ATP9A	-4.79315
PTDSS1	-4.79566
GPR27	-4.79663
DGKG	-4.79727
EHBP1L1	-4.79938
GPRC5C	-4.80471
LOC101927752	-4.80583
SUFU	-4.80584
SBF1P1	-4.80636
CCDC112	-4.80884
CCDC6	-4.80955
DIO2	-4.81247
PSME1	-4.81407
RNASET2	-4.81455
ZNF541	-4.81638
ANOS1	-4.81716
KCNQ1	-4.8175
FPR1	-4.82106
CIB1	-4.82311
CA10	-4.82482
ZNF697	-4.82551
GGCX	-4.82563
HTR3B	-4.82624
GPR83	-4.82661
SNRPC	-4.8292
TMEM108	-4.83414
PSD3	-4.83761
LINC01547	-4.83817
GOLM1	-4.83848
RAPGEF4	-4.84
RAPH1	-4.84236
PRDM12	-4.84316
CFL1P1	-4.84384
2024-03-04	-4.84662
GRIN2C	-4.84687
LIMS2	-4.84861
SSC5D	-4.84996
ZMAT1	-4.8509
GLRA3	-4.85421
NR2C2AP	-4.85513
EIF3D	-4.85699
CNTN1	-4.86197
CHRDL1	-4.86222
LOC105376064	-4.86262
NCAM1	-4.86463
CXADR	-4.86518
LRRC4C	-4.86697
COPZ1	-4.86729
INAFM1	-4.86784
KLK5	-4.86998
BYSL	-4.87147
ATF7IP2	-4.87225
TMEM61	-4.87229
FABP5	-4.87347
FNDC9	-4.87687
PNPLA3	-4.87891
LCP1	-4.87966
AKR7A2P1	-4.88096
EGR4	-4.88145
ENOX1	-4.88182
2024-09-11	-4.88336
DRC1	-4.8867
TATDN2	-4.88723
MT2A	-4.88788
CES4A	-4.88813
SLC2A12	-4.89113
SPATA18	-4.89325
MILR1	-4.89991
ZFP36L1	-4.90029
AFAP1	-4.90407
RARS	-4.90516
FBXO15	-4.90584
ISG15	-4.90672
C1orf115	-4.90889
TBC1D13	-4.91321
MIF	-4.91361
ITGB7	-4.91569
VSIG8	-4.9218
MPP2	-4.92198
DBN1	-4.92655
PTCH1	-4.92768
COL23A1	-4.93011
NPM3	-4.93495
CAPG	-4.9375
ALPL	-4.93954
FBXO17	-4.94232
ALOX5	-4.9441
FAM151B	-4.94867
PDGFD	-4.94929
TMEM170A	-4.95179
ONECUT1	-4.95429
LXN	-4.95548
ZMYND15	-4.95642
DUSP14	-4.95643
MRPL49	-4.95718
ZNF677	-4.96323
MAPK8IP1	-4.96399
CNTNAP3B	-4.96539
LOC100240735	-4.96884
PIP4K2B	-4.97009
INTS4	-4.97083
TBC1D14	-4.97138
PNPLA4	-4.9766
COPS6	-4.97729
DSTN	-4.97823
MEDAG	-4.98581
TYRP1	-4.98946
ITPKA	-4.9917
PEX10	-4.99432
DNAJA4	-4.99464
ACOX3	-4.99519
TAF10	-4.99649
HCFC1R1	-4.99744
OBSCN	-4.99961
DPYSL4	-5.0022
NUDT18	-5.00547
HGH1	-5.0155
GNB2	-5.01667
KXD1	-5.02072
LOC101927974	-5.02229
RPS6KA2	-5.02291
NBEA	-5.02461
ACAT2	-5.0247
PSMB6	-5.0257
PRKAA2	-5.02802
PYCARD	-5.02851
ORC6	-5.03012
P4HA2	-5.03743
TAMM41	-5.03845
NHP2	-5.03871
IQSEC2	-5.03924
LOH12CR2	-5.03959
SLC26A8	-5.04075
ME3	-5.04192
VSIG10L	-5.04299
RPL29P2	-5.04449
TIMP1	-5.04549
SUB1	-5.04648
ZFR2	-5.0468
MTMR3	-5.04789
STAT6	-5.05035
KCTD10	-5.05132
NAGK	-5.05423
TIMM13	-5.05514
TNIK	-5.05858
TUNAR	-5.06219
ASB5	-5.06329
LMF1	-5.06702
MFSD12	-5.06719
TMEM18	-5.07261
RASAL3	-5.07311
S100A6	-5.07578
CISD3	-5.08165
GDF15	-5.0822
MORN2	-5.08298
C1QTNF12	-5.08405
ZDHHC12	-5.08426
SEMA3D	-5.0849
ARHGDIA	-5.08639
TRIM17	-5.08704
TMSB15B	-5.08772
RNF181	-5.08912
CPVL	-5.09017
NEDD4L	-5.09071
RSPO3	-5.09802
FAM174B	-5.10501
SMARCD1	-5.10507
KCNA4	-5.10703
ISOC1	-5.11115
AP3M2	-5.11157
MUM1L1	-5.11511
TWIST1	-5.11565
TPM3P9	-5.12496
DMD	-5.12541
GHR	-5.13025
TOMM6	-5.13133
IGFN1	-5.13608
SHF	-5.14052
TRIM71	-5.14397
NR2F2	-5.1492
LIPT2	-5.14954
GRM8	-5.1506
LY96	-5.15109
PGAP3	-5.15439
OTUB2	-5.15828
UMPS	-5.16387
TRAPPC9	-5.16402
MRC1	-5.16465
EXD3	-5.16836
THAP8	-5.16842
LOC441204	-5.16849
VEZT	-5.16866
WDR25	-5.17201
ZNF391	-5.17557
BCKDK	-5.1776
GSS	-5.17988
EBP	-5.18149
EDF1	-5.18199
DCAF15	-5.18397
ENO1	-5.18533
SEM1	-5.18746
MBLAC2	-5.18953
MPP3	-5.18957
PRAF2	-5.19011
IGSF23	-5.19231
OXCT1	-5.19604
RPS10	-5.19712
PAX6	-5.19884
SELENON	-5.19958
PLXNA1	-5.20061
IFI27L1	-5.20504
ROMO1	-5.20663
APBB1IP	-5.20843
FYB1	-5.21356
TNFRSF11A	-5.21518
TLDC1	-5.21678
VIM	-5.21862
SYTL5	-5.21868
MLIP	-5.2192
ZNF229	-5.22499
PPP1R9B	-5.22735
CLDN4	-5.23017
TOX3	-5.23224
TTYH1	-5.2324
S100Z	-5.23378
PHF24	-5.23562
ARL4A	-5.23951
SEC61G	-5.24072
AKR7A2	-5.2446
WDR17	-5.24769
SGSH	-5.2492
TMEM53	-5.2496
GNB1L	-5.2505
SNAP29	-5.25225
DNAH12	-5.25326
MMP16	-5.25456
SOCS7	-5.25517
FZD3	-5.26298
RYR1	-5.27081
UQCC3	-5.27266
GLDC	-5.27503
COG5	-5.27535
CNTNAP3	-5.27546
LOC105374952	-5.27655
ADGRB3	-5.28255
EGR3	-5.29207
SLC25A22	-5.29406
COA6	-5.29622
POLR3GL	-5.29702
PRMT2	-5.29856
CCDC71L	-5.30078
HAPLN1	-5.30217
C1QL2	-5.30585
EPCAM	-5.30727
CD84	-5.30921
CHP2	-5.31161
PTRHD1	-5.31834
GPM6A	-5.31897
FANCL	-5.33355
YWHAH	-5.33677
COL16A1	-5.33806
RALGPS2	-5.33888
LOC440434	-5.33969
FZD8	-5.34122
SOX11	-5.34437
STX12	-5.34548
RUBCN	-5.34622
DNAH14	-5.34711
DENND2C	-5.34999
KCTD12	-5.35161
DNAJC2	-5.35177
UQCR11	-5.35285
MARCO	-5.36306
PERM1	-5.36357
FAM212B	-5.36668
MZT1	-5.36863
NRN1L	-5.37227
TPM1	-5.3725
TIMP2	-5.37316
FAM160A2	-5.37564
LRP1B	-5.37583
PELI1	-5.37612
UFM1	-5.38126
VPS37D	-5.3816
CTBP2	-5.38394
HBM	-5.39137
ATP5MC1	-5.3921
C9orf16	-5.39362
LOC102724156	-5.39893
FOXJ3	-5.40014
TMEM150C	-5.4027
PET100	-5.40432
LOC100506271	-5.40563
ST6GALNAC6	-5.40621
PON3	-5.40688
SPRN	-5.4118
SPICE1	-5.42053
INTU	-5.42168
PPP1R32	-5.42283
CPE	-5.42298
SMKR1	-5.42526
CACNA2D1	-5.42958
ARHGDIB	-5.43142
BSN	-5.43314
ERBB2	-5.43315
MALL	-5.4349
DHCR7	-5.43581
MCFD2	-5.44668
TSPYL2	-5.44814
CFP	-5.44814
EDN1	-5.44981
SLC2A14	-5.45033
CLPS	-5.45616
MLF1	-5.45746
EIF6	-5.45858
DIAPH2	-5.46004
LDOC1	-5.46041
LINC02217	-5.46234
NEURL1	-5.46288
LAMP5	-5.46402
FABP5P3	-5.46597
DUSP28	-5.47183
HPCAL1	-5.47528
PYGL	-5.47639
FAM172A	-5.47807
CFAP44	-5.47821
SNAI3-AS1	-5.47998
AGPAT1	-5.48117
SH3BGR	-5.4816
FREM3	-5.48596
TOPBP1	-5.48653
PLXNC1	-5.49147
SOBP	-5.49206
DGKA	-5.49358
SGSM2	-5.49669
MAST3	-5.49862
GRK6	-5.50249
LOC105372480	-5.50432
FDX1L	-5.50953
NUDT2	-5.50966
CXADRP2	-5.51162
ST20	-5.51361
BEX1	-5.51405
CTC1	-5.5146
FZD2	-5.52215
MAN1B1-AS1	-5.52474
CELF6	-5.5292
TECPR2	-5.53323
EFHB	-5.53422
ABCB6	-5.53439
TMTC1	-5.53635
SPATC1L	-5.5404
KRBOX4	-5.54095
RESP18	-5.54822
BCL2A1	-5.54906
RIMBP2	-5.55055
RSPH14	-5.55381
PDE1A	-5.55774
UQCC2	-5.55976
SLITRK1	-5.55987
NUDT14	-5.56469
ADCK5	-5.56499
UPP2	-5.56618
FGFBP3	-5.56662
PTS	-5.56737
MPV17L2	-5.56933
PDRG1	-5.56966
RBM8A	-5.57077
RGS22	-5.57259
MOXD1	-5.57594
MYADM	-5.57673
TXNL4A	-5.57981
PKP3	-5.58575
HTR4	-5.5893
MAGEH1	-5.58937
ZMIZ2	-5.58963
ZMYM3	-5.59204
GABRB3	-5.59598
TBCD	-5.59719
RPS2P32	-5.59757
AK5	-5.59845
ARPC5	-5.59929
GAR1	-5.60866
ALCAM	-5.60898
LOC441666	-5.61458
DNAH5	-5.62053
MTCH1	-5.62185
DOK1	-5.63188
KCNE4	-5.6349
CASP5	-5.63559
NOL4L	-5.63931
LY86	-5.63945
LIMD2	-5.64182
METTL5	-5.64289
C8orf34	-5.64372
DHRS2	-5.64401
GRAMD4	-5.64454
SNRPD3	-5.64483
TMEM234	-5.64693
TCEAL9	-5.64725
GRM1	-5.64863
SLC27A2	-5.64925
P2RY13	-5.65121
SIVA1	-5.65795
CENPP	-5.66027
CTGF	-5.66448
ATP5ME	-5.66812
CAMKV	-5.67086
NECTIN3	-5.67355
PPP1R18	-5.67864
PANX2	-5.67901
NICN1	-5.68337
KLHL35	-5.68898
BLOC1S1	-5.71941
NIPSNAP3A	-5.72346
PPDPF	-5.73114
EPHA5	-5.73507
PDS5A	-5.74503
GNAQ	-5.74562
E2F5	-5.74855
GPSM1	-5.74949
CCNH	-5.74994
WIPI2	-5.75023
SLC17A7	-5.75551
PGRMC1	-5.76194
CKS1B	-5.76203
AKAP5	-5.77274
RPL29	-5.77399
TEKT2	-5.77674
ARMCX1	-5.77745
OVOL2	-5.7789
CCDC90B	-5.78489
SH3GL3	-5.79974
PSMB2	-5.80037
RXRA	-5.8006
WNT7B	-5.80518
ENTPD6	-5.80525
CDH10	-5.80641
CDKN1A	-5.80885
AFF2	-5.80925
DERL1	-5.81118
NDUFA6-AS1	-5.81163
CAPN12	-5.81362
ARPC3	-5.81818
SMIM4	-5.82012
HYI	-5.82246
MYL6B	-5.82297
ASXL3	-5.82693
SMAD2	-5.83032
CABYR	-5.83356
JPT1	-5.83463
LOC441052	-5.83779
PGAP1	-5.83888
BTC	-5.84919
CD8A	-5.85416
DISP2	-5.856
TMEM54	-5.858
PHF13	-5.86014
GGTA1P	-5.87227
A1BG-AS1	-5.87503
SMIM27	-5.87603
KCNMB4	-5.88385
CABCOCO1	-5.88445
C6orf118	-5.90415
HCST	-5.90675
LINC01750	-5.91017
SAP30BP	-5.91384
UBE2S	-5.91655
WTIP	-5.91842
OR14I1	-5.91982
LIG1	-5.92022
C2orf69	-5.92363
WFS1	-5.92406
USP11	-5.92499
CACNA1E	-5.9288
TMEM17	-5.92987
ZMAT2	-5.93123
NELFE	-5.93763
FARP1	-5.93863
MYRIP	-5.94161
OPTN	-5.94293
NPY5R	-5.9538
IL3RA	-5.95781
ZNF575	-5.95896
CDH3	-5.95957
NFKBIE	-5.96068
VIT	-5.96697
RNF7	-5.96963
RRP7BP	-5.9709
SNX7	-5.97373
SSBP2	-5.97921
ZRANB3	-5.9834
ASPHD2	-6.00228
TMEM233	-6.00746
GRASP	-6.00768
MRAS	-6.00876
CETN2	-6.00935
PDGFRA	-6.01838
ACTR3C	-6.01852
PPIL6	-6.01988
BBC3	-6.02242
BABAM2	-6.02371
LRMDA	-6.02837
ACADL	-6.03796
IFI27L2	-6.04154
CARD17	-6.04362
CORO1A	-6.04766
RIN1	-6.052
SSC4D	-6.07002
DNAJA1	-6.07047
SIGLEC11	-6.07268
NUPR2	-6.07613
BLVRB	-6.0777
CEP170B	-6.08761
MAPK11	-6.0877
FAM229B	-6.08912
FEZF2	-6.08949
SNAPC5	-6.09053
CNIH3	-6.09239
JAKMIP1	-6.0933
ANXA1	-6.09739
ENC1	-6.10012
COPS4	-6.10061
PINLYP	-6.10563
SKAP2	-6.11468
P3H2	-6.11815
ZNF215	-6.1198
CYP46A1	-6.12005
PACS1	-6.1221
CA11	-6.12252
SYTL2	-6.12894
ARRB1	-6.13158
CHST15	-6.1323
NPDC1	-6.13369
C1orf220	-6.14385
ERICH3	-6.14728
LYPD1	-6.15178
PACRG	-6.1525
PALM3	-6.15645
NFIB	-6.15675
HSPB11	-6.15715
MAD2L2	-6.1596
GABRA2	-6.15981
LOC645166	-6.16179
MORN3	-6.16269
PSMG3-AS1	-6.16463
VPS37C	-6.16863
APAF1	-6.17109
LOC728392	-6.17165
SIDT2	-6.17487
CCT5	-6.18594
PTER	-6.18752
CDC6	-6.18953
BCS1L	-6.1932
SIGIRR	-6.19494
RTP1	-6.19876
GUK1	-6.20705
GOLT1A	-6.20794
EFNB2	-6.2137
DNAJC12	-6.21646
TRPV2	-6.21854
B3GNT4	-6.23037
ZCCHC17	-6.23153
DUSP18	-6.23614
PIANP	-6.23726
DNAL4	-6.24016
ATP6V1C1	-6.25408
HRK	-6.25464
PKD2L1	-6.25608
CSPG4	-6.25663
NPB	-6.25982
DYNLL1	-6.26125
FAM120AOS	-6.26458
NISCH	-6.26519
CADM3	-6.26559
NR4A3	-6.2668
SFMBT2	-6.26812
EMP3	-6.26933
PSENEN	-6.27024
DDN	-6.2729
LINC02482	-6.27499
LOC149373	-6.27691
RLBP1	-6.27717
LMCD1	-6.27951
ZC3HAV1	-6.2812
TMEM120A	-6.28687
RAB27B	-6.28963
2024-03-01	-6.29691
GRIK2	-6.3011
LOC729683	-6.30174
CEP83	-6.30387
KLF6	-6.30431
LRRC57	-6.3046
JPH1	-6.30852
CYB5R1	-6.3127
FAM212A	-6.31313
CACNB3	-6.31357
COL21A1	-6.31692
AMZ2P1	-6.3194
VWCE	-6.32813
PPEF1	-6.32942
TUSC3	-6.33867
SAMD9	-6.35107
ACKR3	-6.35456
RILPL1	-6.35509
RBBP7	-6.35987
LOC285097	-6.36023
SMAD1	-6.36155
CPLX3	-6.36255
CELF4	-6.36767
NDUFB1	-6.37102
IL12RB2	-6.37163
VAT1L	-6.37273
DAPL1	-6.37413
RBFA	-6.37949
IKBIP	-6.38897
ADAMTS9	-6.40235
TBXA2R	-6.40366
AHCY	-6.40645
FDPS	-6.40986
RGS4	-6.41172
TMEM176A	-6.41406
TMEM181	-6.41878
CHD3	-6.42303
AKR7L	-6.42502
PPP5D1	-6.4302
UBE2Z	-6.43435
KCNMB2	-6.4409
PCDH19	-6.45187
C1R	-6.45191
KCNK1	-6.45502
ANO2	-6.46101
MAFG	-6.46274
SMAD3	-6.46833
FCGBP	-6.47358
RNASEH2C	-6.47543
TXLNB	-6.47832
ZNF727	-6.48241
TEK	-6.48847
EMG1	-6.49512
TUBB2A	-6.49587
NDUFC2	-6.49838
LRRC7	-6.50484
EFNB1	-6.50638
ACTR1A	-6.50751
SLC2A4RG	-6.51558
CCNA1	-6.51966
HACD4	-6.52861
MZT2B	-6.54146
CNTN3	-6.54291
APOPT1	-6.54404
FUOM	-6.54457
SIL1	-6.54701
RPL36	-6.54832
DYRK3	-6.55719
LOC93622	-6.55841
FOLR2	-6.57035
SMIM10L2B	-6.57637
DRAXIN	-6.59021
NPY	-6.59147
CCL28	-6.59835
C12orf75	-6.60615
ADIRF	-6.60972
MCTP1	-6.61012
STX17-AS1	-6.61259
PMVK	-6.6143
HES1	-6.61689
CHTF18	-6.62029
PTPRF	-6.62115
PHPT1	-6.63377
NUPR1	-6.64134
TGFBR3L	-6.64735
HOPX	-6.64939
AP5S1	-6.65308
KRT17	-6.66681
SCN7A	-6.68087
HMGCR	-6.68223
ZNF226	-6.68323
YWHAZ	-6.68457
TTC9B	-6.69305
CPNE7	-6.69606
ASH1L-AS1	-6.71145
ISLR2	-6.71855
PTPRA	-6.72685
LDHD	-6.72884
TRPC4	-6.73056
CFAP52	-6.73309
PRSS3	-6.73833
SQLE	-6.74488
CACNG3	-6.74564
LSM7	-6.75653
CD6	-6.76244
ADAP2	-6.76397
FAM241B	-6.76479
PRRC2B	-6.77334
CSF1R	-6.77408
JUN	-6.78442
MRPL37	-6.78667
MZT2A	-6.79386
EMID1	-6.79407
SFTPD	-6.80254
PSMB1	-6.80502
TP53I11	-6.80707
DIRAS3	-6.81454
TM2D3	-6.82625
ADAMTS19	-6.82725
SSBP4	-6.83046
GLP2R	-6.83182
TUBB8P12	-6.84093
CRLF1	-6.84353
CCBE1	-6.84725
FOXRED2	-6.84889
LRRC73	-6.85422
NLE1	-6.86181
FXYD6	-6.86512
TNFSF12	-6.87114
PHLDB3	-6.87301
ELL3	-6.88062
ARL16	-6.89575
SHISA5	-6.901
GPM6B	-6.91029
SLC27A5	-6.91214
C2CD2L	-6.9151
RFC3	-6.91993
OPN4	-6.92192
HECTD2	-6.92231
BPHL	-6.924
PGM2L1	-6.93828
CIB2	-6.93847
STIM1	-6.95459
VAV1	-6.96375
EIF4EBP1	-6.97137
SEMA4A	-6.97263
LINC01551	-6.97461
ZSWIM9	-6.97797
WDFY4	-6.98078
PNMA8A	-6.99441
NDUFAF8	-7.00176
C3orf14	-7.01272
AMIGO2	-7.01424
LUZP2	-7.01565
GLT8D2	-7.01617
TSPAN4	-7.03373
ADCY7	-7.03598
TUBB6	-7.03857
TINCR	-7.0425
SPINT2	-7.04519
NACC1	-7.04568
PTCHD1	-7.05028
NBDY	-7.07914
TNNI3	-7.08344
ADCY2	-7.08528
CYB5D2	-7.08629
RSPH1	-7.08701
HRASLS	-7.09363
C8orf46	-7.09765
NEBL-AS1	-7.10114
SOX5	-7.10212
VSTM2L	-7.10618
PITPNM2	-7.10662
SDK2	-7.12182
LINC00461	-7.12247
FSTL5	-7.12251
DUSP5P1	-7.12582
GMIP	-7.13452
STX1A	-7.13889
MCM3	-7.13981
KIF21B	-7.14997
HSD11B1L	-7.15419
TMSB4X	-7.15834
CAP1	-7.16491
NUMBL	-7.17145
IL1B	-7.17152
GNAZ	-7.17677
DLG2	-7.17825
PJA1	-7.18109
PSMB7	-7.18941
ANK3	-7.19459
UG0898H09	-7.20722
ADM5	-7.22079
FBL	-7.22335
ANKRD30B	-7.23214
CMSS1	-7.23694
IL33	-7.2405
DDA1	-7.24306
LINC00937	-7.24506
GPD2	-7.25753
CNGB1	-7.25848
IPO5P1	-7.26752
JPH4	-7.26976
HPCA	-7.2711
CRIP2	-7.275
RNASEH2A	-7.27683
CNRIP1	-7.278
C16orf58	-7.30157
HRH1	-7.30277
C1orf226	-7.30909
CPT1C	-7.31612
ARHGAP36	-7.32506
PLPPR2	-7.32712
CANX	-7.32727
DOC2B	-7.34011
SRRD	-7.35981
HBZ	-7.39192
NUTF2	-7.40216
DHX58	-7.41328
ARL10	-7.42067
ABHD17C	-7.42106
PSME2	-7.42826
ACOT8	-7.43407
PDGFC	-7.43774
MAN1A1	-7.4465
TENM3	-7.44706
ST6GALNAC5	-7.44825
HGF	-7.45449
DENND1A	-7.47211
PEG10	-7.48868
LOR	-7.4902
FDXR	-7.49981
PBX4	-7.51074
TLN2	-7.52184
CDC42BPB	-7.52519
TRIM24	-7.5345
C5orf49	-7.54201
CYTOR	-7.54866
GGCT	-7.55119
LINC00900	-7.55567
FNBP1L	-7.57644
LRRC2	-7.59668
B3GALT6	-7.60839
NPHS1	-7.6121
ARHGAP28	-7.62292
TAGLN2	-7.62412
SYN2	-7.62532
RGS20	-7.65362
GATB	-7.65481
WDR54	-7.66197
LRRC42	-7.66244
TYRO3	-7.6668
TRAIP	-7.6716
ACOT2	-7.67451
CD63	-7.68509
ACVR2A	-7.68814
GNPTAB	-7.69217
FABP3	-7.69314
TSEN34	-7.69369
CCDC28A	-7.69388
WDR6	-7.69418
ADTRP	-7.69634
PYCR1	-7.71124
LIN7B	-7.72867
TRIM27	-7.72978
CYS1	-7.72985
SARNP	-7.7357
AMZ1	-7.73576
ZNF580	-7.73653
FOXG1	-7.74172
CMTM8	-7.74821
CYP26A1	-7.75768
CLEC4G	-7.76284
EPHA10	-7.7631
OPRK1	-7.76438
C1S	-7.76479
MCUB	-7.7715
ERLIN1	-7.77268
LOC644189	-7.78277
EPB41L4B	-7.79345
LY86-AS1	-7.79471
FAM117A	-7.8025
BEGAIN	-7.81744
CMIP	-7.81962
VPS37B	-7.82502
E2F3	-7.82713
GCNT1	-7.82842
WFDC1	-7.83472
PRKCG	-7.83671
CRYM	-7.84626
UHMK1	-7.85579
GNG10	-7.87063
KLHL1	-7.87735
FLJ33534	-7.88617
SMIM10L2A	-7.88985
LOC101927027	-7.89437
FZD1	-7.90692
SLC35F2	-7.91163
NHLRC1	-7.91594
RPL12	-7.92285
SRSF12	-7.92542
PALMD	-7.93216
FBXO2	-7.93968
KRT14	-7.94838
CSGALNACT1	-7.94943
PRSS2	-7.95061
SLC30A3	-7.95736
IGSF22	-7.95836
IDNK	-7.95975
ARPP19	-7.96929
TFPT	-7.9793
TMEM196	-7.98332
CHMP1A	-7.98426
PRPH2	-7.98706
BTBD9	-7.98706
GMFB	-8.00698
NKAIN3	-8.0102
BTG3	-8.01304
LOC729970	-8.03391
PRSS1	-8.03534
ANKRD50	-8.04594
PCBD1	-8.05226
TBC1D24	-8.05352
CEBPA	-8.05478
ANXA11	-8.06462
FAM171B	-8.08837
CCDC85C	-8.08977
NOL4	-8.08993
PYCR3	-8.0909
KLF10	-8.09181
PLCB2	-8.10906
GPNMB	-8.11089
MR1	-8.1122
RTN4RL2	-8.11601
SIN3B	-8.13837
GRID2	-8.16715
GPR150	-8.17487
FKBP1B	-8.18899
MAPK3	-8.22972
UBL5	-8.23904
GPR68	-8.26106
PLAC9P1	-8.27471
RPL39L	-8.28256
HCG23	-8.28419
RIPK2	-8.30305
CHCHD6	-8.30933
C1orf194	-8.32822
LINC02076	-8.33078
IGFBP5	-8.33873
BORCS7	-8.35096
FAM181A	-8.35741
DNAAF4	-8.37043
LINC01197	-8.37588
TAC3	-8.38268
PTPRR	-8.39294
PCDH17	-8.40038
FHOD3	-8.41996
MEIS3	-8.42382
ARHGAP6	-8.42641
CALHM6	-8.43604
NANOS1	-8.45098
NEURL1B	-8.46406
KLK10	-8.47139
SUSD1	-8.48855
SLC30A10	-8.49611
MDGA1	-8.50068
TOM1L1	-8.50279
COG1	-8.50627
LARGE1	-8.51202
ARPC2	-8.51284
DDX54	-8.51288
KLHDC8B	-8.52193
SSSCA1	-8.53965
TMSB10	-8.55043
PALM	-8.55876
TRAPPC2L	-8.56866
CELF5	-8.5703
NEUROD2	-8.57304
SOX4	-8.57949
KLF8	-8.58124
TLL1	-8.58605
ZNF706	-8.59956
CDH4	-8.60487
FILIP1	-8.60836
GSKIP	-8.61597
FIGNL2	-8.61932
COCH	-8.62355
DTNBP1	-8.62842
GABRE	-8.63171
OGG1	-8.63475
LSP1	-8.6365
PCED1B	-8.64159
DRAIC	-8.64259
GMFG	-8.64817
TMEM107	-8.66012
CRSP8P	-8.66417
SLC25A23	-8.66781
FAM187A	-8.67279
NKAIN2	-8.681
SLC4A3	-8.69568
NR4A2	-8.7008
HSPB3	-8.70436
COMTD1	-8.73358
LTBP4	-8.73534
ADRA1B	-8.7388
TKFC	-8.76306
TXN	-8.76477
SH3RF1	-8.7736
TIMM10	-8.77663
CENPVL3	-8.77774
MYL5	-8.78308
LRRN2	-8.80627
GTF2H5	-8.81066
SH3BGRL3	-8.81124
C19orf12	-8.81749
SULF2	-8.81942
SLC39A4	-8.8207
PRR5	-8.82317
ELFN2	-8.8234
NPTXR	-8.86375
OCA2	-8.86618
ARHGAP33	-8.88382
DOC2A	-8.92505
RPL27A	-8.92919
NABP1	-8.92935
MOB1B	-8.9305
NEUROD6	-8.93106
SLC16A8	-8.98014
ADGRV1	-9.00364
ASCL2	-9.00671
STYK1	-9.00995
PSORS1C1	-9.01509
DPF1	-9.02343
SMIM29	-9.03098
DDRGK1	-9.03785
RTBDN	-9.0399
RRAS2	-9.04726
CCKBR	-9.04763
NETO1	-9.05397
NKAIN4	-9.0718
ANKRD19P	-9.0739
LYPD8	-9.07625
YJEFN3	-9.0947
PAFAH1B3	-9.09625
NPTX1	-9.10315
THTPA	-9.12207
LINC00484	-9.12875
ACKR1	-9.1499
MIR4435-2HG	-9.17175
CGREF1	-9.2056
CCDC3	-9.22053
B9D1	-9.23646
SERTM1	-9.2455
SLC26A4-AS1	-9.24724
PTRH1	-9.24857
CCDC189	-9.25334
FAM19A1	-9.25508
GSTM5	-9.31102
UBA52	-9.33073
MAPK1	-9.34317
MACROD2	-9.34966
PLB1	-9.36647
MBOAT7	-9.40256
PPM1N	-9.40579
DUSP23	-9.41796
NSFL1C	-9.42417
TCEA3	-9.42939
DDAH2	-9.43839
RASGEF1C	-9.44436
DGKB	-9.44586
AHRR	-9.45333
LRRC3B	-9.46739
LINC00260	-9.47077
TMEM130	-9.48492
MYL12B	-9.48617
PCDH20	-9.50886
ZCCHC18	-9.54029
SNRNP27	-9.54085
CXorf57	-9.55122
CDKN2D	-9.57371
MKL2	-9.57399
TRIB3	-9.59173
NKD2	-9.602
DACT1	-9.60387
A1BG	-9.60436
SHISA9	-9.60845
NOVA2	-9.61374
SNHG8	-9.61427
SLC26A11	-9.62807
EPOP	-9.64322
POLE4	-9.65384
KCNG3	-9.66181
BAIAP2	-9.69751
SST	-9.69816
XKR4	-9.70336
SCPEP1	-9.70422
PDYN	-9.70814
CNR1	-9.70966
ADRA2C	-9.73607
SEMA4F	-9.74976
AP3S1	-9.75047
XYLT1	-9.75805
CD52	-9.77722
ACTR3B	-9.7808
SLC26A4	-9.78372
RGMB	-9.78919
MYB	-9.79066
NUDT10	-9.79808
NTNG2	-9.83323
SPON2	-9.85259
POC1A	-9.86857
RASL10A	-9.86971
PEX19	-9.89827
PID1	-9.90847
SORBS2	-9.94387
THRA	-9.94737
ZSCAN18	-9.96347
ECHDC3	-9.98203
PRSS3P2	-9.99959
GPR88	-10.004
GPR6	-10.0044
ZNF436	-10.0073
EXOC6	-10.0225
POLR2L	-10.0267
GPC4	-10.0635
SCARA5	-10.0705
DOK6	-10.0762
C1QL1	-10.088
LOXL1	-10.0909
SLC16A2	-10.1091
CPNE5	-10.1105
C1orf50	-10.1121
SLN	-10.131
PNCK	-10.1382
GSTM3	-10.1464
PCSK5	-10.1478
TG	-10.1598
DACH2	-10.189
TBC1D26	-10.2261
FAM129B	-10.238
PTGES	-10.2439
LOC100506100	-10.245
SYNPR	-10.2589
RASL11B	-10.276
OST4	-10.2931
PLAC9	-10.2969
CHID1	-10.3181
GRP	-10.3274
GASAL1	-10.3279
C1QL3	-10.3322
TCAP	-10.3574
GNG2	-10.3716
HTR2C	-10.3783
SLC8A2	-10.3813
FKBP1A	-10.387
SF3B3	-10.389
DLL3	-10.3977
TIMM8B	-10.3997
RGS14	-10.4285
ARHGEF28	-10.4329
GABRA3	-10.4504
RAET1E-AS1	-10.4624
C2orf80	-10.5182
ARHGAP4	-10.5618
RMI2	-10.5977
MTA3	-10.6005
S100A10	-10.6075
LRRC36	-10.6597
MYH7	-10.6904
MARCKS	-10.6924
TSPOAP1	-10.7041
SYT10	-10.7101
FAM149A	-10.7245
HPCAL4	-10.7261
DEAF1	-10.7305
SPPL3	-10.7332
CDH9	-10.742
KLK7	-10.7519
C11orf97	-10.7746
SNCA	-10.7834
TNNT1	-10.8215
NWD2	-10.8301
SLIT3	-10.8405
HNRNPC	-10.8663
WNT10B	-10.8753
NCAM2	-10.8839
CACNA1H	-10.8846
HES5	-10.9002
MANEAL	-10.9421
BFSP1	-10.9432
PLPPR3	-10.9556
GNB4	-10.9956
PYDC1	-11.0073
SCGN	-11.0301
RHBDD2	-11.0654
PTGER4	-11.0777
NPPA	-11.0862
NPY1R	-11.1146
SSTR2	-11.1587
LMO3	-11.187
UCHL3	-11.2091
BATF3	-11.232
RNF150	-11.239
CREM	-11.2734
PRKCD	-11.2863
STOML1	-11.3248
NTSR1	-11.3799
PEA15	-11.4052
PRSS35	-11.4523
SCN3B	-11.4608
TMEM158	-11.4701
SLC17A8	-11.4784
LINC01140	-11.4791
LSM3	-11.5081
LOC642852	-11.5169
CPAMD8	-11.5317
SVOP	-11.5548
NNAT	-11.5907
WDR66	-11.6076
PLPPR4	-11.6597
SPATA33	-11.6689
NOV	-11.7231
LOC100507351	-11.7314
TMEM263	-11.7388
CTXN1	-11.8228
EFNB3	-11.8313
GPRIN1	-11.9375
ANO3	-11.9479
NIT2	-11.9642
PPP4R4	-11.9721
ERICH6-AS1	-11.9928
SCN9A	-12.0035
SMARCD3	-12.0438
GLRA2	-12.0743
ICAM5	-12.0992
CD24	-12.1708
PPP1R1A	-12.1888
BIRC3	-12.2199
ALKAL2	-12.2575
HIST1H2BK	-12.2604
ERFE	-12.2655
JPH3	-12.3472
LOC100288911	-12.3583
MSANTD1	-12.3708
SOWAHA	-12.3977
GDA	-12.441
TMEM200A	-12.4561
F12	-12.4919
RASAL1	-12.5421
TSTD1	-12.5841
FAM110C	-12.6284
MESP1	-12.6363
ZCCHC12	-12.8264
GLOD4	-12.831
DHDH	-12.882
NECAB2	-12.8854
GABRB1	-12.8916
YPEL1	-12.9087
BAIAP3	-13.0081
IFT22	-13.0173
STUM	-13.0309
LY6H	-13.0615
PNMT	-13.0807
WDR86	-13.1421
GRIN3A	-13.2064
KCTD4	-13.2079
RAB36	-13.2132
SLC7A4	-13.2196
UNC5B-AS1	-13.2656
CFD	-13.3396
HTR1A	-13.3702
DPYSL3	-13.4276
GRIA1	-13.5257
PDE2A	-13.5265
ANKRD6	-13.584
TDRD9	-13.6334
DKFZp779M0652	-13.6414
KIRREL2	-13.6503
LYRM9	-13.7017
HBQ1	-13.7237
DYDC2	-13.9428
RRP7A	-13.9499
GNG4	-14.0096
ATOH7	-14.1968
CPNE6	-14.2217
PTGER3	-14.2686
LOC100129291	-14.2714
GABRA5	-14.3464
CENPW	-14.3923
RIPOR2	-14.4076
IL13RA2	-14.4227
PPM1M	-14.527
FAM71F1	-14.621
DNAH2	-14.6629
RSPH9	-14.8207
ZNF831	-14.9253
RBP4	-15.1054
ATP2B4	-15.1226
SSTR1	-15.1471
RILPL2	-15.1918
SLIT1	-15.329
RIIAD1	-15.3476
FABP7	-15.3797
TMEM159	-15.5157
NUDT11	-15.6736
SYT17	-15.7033
LRRC56	-15.712
PKIA	-15.7181
EFCAB1	-15.8434
MMD	-16.0454
SLA	-16.308
RAP2B	-16.7594
C2CD4C	-17.3831
KCNG1	-18.0308

## Sheet: Table S9
Table S9.Genomic loci shared between MDD and GLU at conjFDR < 0.05.
GenomicLocus	uniqID	rsID	chr	pos	p	start	end	nSNPs	nGWASSNPs	nIndSigSNPs	IndSigSNPs	nLeadSNPs	LeadSNPs
1	1:44183923:C:T	rs112361411	1	44183923	2.53066657633e-08	44007366	44295047	158	127	1	rs112361411	1	rs112361411
2	1:214129126:C:T	rs340869	1	214129126	2.52206773038e-08	214102041	214143013	35	26	1	rs340869	1	rs340869
3	2:27164806:A:G	rs3820823	2	27164806	1.28537973387e-08	27098766	27374009	241	178	3	rs3820823;rs12617392;rs1275509	1	rs3820823
4	2:27964328:C:G	rs9678824	2	27964328	6.92369996355e-09	27674931	28299267	325	247	3	rs9678824;rs12466717;rs814295	1	rs9678824
5	2:208088537:C:T	rs960379	2	208088537	2.15482590375e-09	208018534	208088987	42	37	1	rs960379	1	rs960379
6	3:49749705:A:C	rs73077157	3	49749705	3.36688027681e-09	48570686	49880399	94	75	3	rs3172494;rs11920251;rs73077157	2	rs3172494;rs73077157
7	3:152151665:G:T	rs76005739	3	152151665	1.28709338552e-08	151992162	152215437	137	101	1	rs76005739	1	rs76005739
8	5:61497716:C:T	rs10069830	5	61497716	1.36263874624e-08	61400197	61540257	75	43	1	rs10069830	1	rs10069830
9	5:77142829:A:G	rs7729225	5	77142829	2.59205795314e-08	77135895	77157607	41	24	1	rs7729225	1	rs7729225
10	9:11269117:C:G	rs7852406	9	11269117	3.08780514342e-08	11256041	11616822	160	136	1	rs7852406	1	rs7852406
11	9:31324237:C:T	rs10970286	9	31324237	4.97024291303e-08	31321465	31349953	14	11	1	rs10970286	1	rs10970286
12	11:17350394:C:T	rs1073443	11	17350394	2.22822936459e-08	17067849	17365209	77	53	1	rs1073443	1	rs1073443
13	11:46759709:C:T	rs3136508	11	46759709	3.16705943493e-08	46260223	47185457	95	68	3	rs7113478;rs3136508;rs11606992	2	rs7113478;rs3136508
14	11:61610750:A:G	rs174584	11	61610750	9.17832225774e-10	61542006	61624181	76	61	2	rs174584;rs2072114	1	rs174584
15	11:64905748:A:G	rs111591982	11	64905748	4.31363560801e-08	64905748	64905748	1	1	1	rs111591982	1	rs111591982
16	12:24224603:C:T	rs12298657	12	24224603	3.64946408018e-08	24153439	24270393	82	66	2	rs12298657;rs12305561	1	rs12298657
17	12:121961947:C:T	rs28644184	12	121961947	7.25408907903e-09	121824291	121988899	141	90	2	rs28644184;rs10849888	1	rs28644184
18	15:38869666:A:G	rs17651741	15	38869666	3.46010884264e-09	38820606	38925195	62	51	2	rs17651741;rs11073334	1	rs17651741
19	17:27322231:C:T	rs11651505	17	27322231	3.6483794553e-08	27078323	27323928	7	7	1	rs11651505	1	rs11651505
20	18:21132571:C:G	rs1788762	18	21132571	3.18082854175e-08	21074255	21165163	37	26	1	rs1788762	1	rs1788762

## Sheet: Table S10
Table S10.Genomic loci shared between MDD and HbA1c at conjFDR < 0.05.
GenomicLocus	uniqID	rsID	chr	pos	p	start	end	nSNPs	nGWASSNPs	nIndSigSNPs	IndSigSNPs	nLeadSNPs	LeadSNPs
1	1:50992883:C:T	rs11205728	1	50992883	2.43159570825e-08	50826176	51500769	271	223	2	rs11205728;rs114540602	1	rs11205728
2	1:214145389:C:T	rs340884	1	214145389	4.8292933851e-08	214144858	214162734	26	16	1	rs340884	1	rs340884
3	2:24098371:A:G	rs113027486	2	24098371	4.24297191062e-08	23890084	24257682	405	315	1	rs113027486	1	rs113027486
4	2:48983817:C:T	rs11681101	2	48983817	3.23777492175e-08	48975546	48997536	11	10	1	rs11681101	1	rs11681101
5	2:175232024:C:G	rs4972652	2	175232024	5.31915186548e-09	175190722	175324323	172	133	3	rs4972652;rs62173634;rs12993286	1	rs4972652
6	3:49678651:A:G	rs4283605	3	49678651	8.16643418657e-10	48370424	50341480	372	264	7	rs62262514;rs2230593;rs1986599;rs12493284;rs4283605;rs3774745;rs2624835	4	rs62262514;rs12493284;rs4283605;rs2624835
7	3:52937774:A:G	rs1134546	3	52937774	1.61102282979e-09	52540773	53175017	597	407	5	rs1134546;rs1080500;rs13081155;rs41292864;rs2256332	1	rs1134546
8	3:56227418:C:T	rs1825561	3	56227418	2.11072763391e-08	56054925	56306633	176	127	1	rs1825561	1	rs1825561
9	3:113210365:A:G	rs72946748	3	113210365	3.38245061234e-08	113010950	113269201	146	105	1	rs72946748	1	rs72946748
10	3:152018223:G:T	rs17368446	3	152018223	5.79147384953e-09	151992162	152215437	137	101	1	rs17368446	1	rs17368446
11	7:75611149:A:G	rs10954732	7	75611149	3.86149925407e-08	75607155	75852480	181	145	1	rs10954732	1	rs10954732
12	7:99675558:A:G	rs13236456	7	99675558	4.19127467742e-08	99633733	99751017	35	20	1	rs13236456	1	rs13236456
13	8:103318034:A:G	rs3018538	8	103318034	4.25026529988e-08	103231331	103456352	87	64	1	rs3018538	1	rs3018538
14	9:98259703:G:T	rs10512248	9	98259703	4.16621494776e-08	98216876	98280656	37	21	1	rs10512248	1	rs10512248
15	9:140006202:A:G	rs13631	9	140006202	3.92437450003e-08	139963935	140011036	25	20	1	rs13631	1	rs13631
16	11:46905983:C:T	rs10838627	11	46905983	3.08265073523e-08	46447246	47185457	93	68	1	rs10838627	1	rs10838627
17	11:61589481:A:G	rs28456	11	61589481	7.34869327036e-10	61539020	61624181	81	63	4	rs28456;rs174575;rs108499;rs174532	1	rs28456
18	15:74499407:A:G	rs351223	15	74499407	4.65692033743e-08	74487036	74512853	11	8	1	rs351223	1	rs351223
19	17:65848994:A:G	rs4791048	17	65848994	2.01313392799e-09	65822573	66096529	328	218	1	rs4791048	1	rs4791048
20	20:16533162:C:T	rs16997877	20	16533162	4.55922292578e-08	16533162	16540035	4	4	1	rs16997877	1	rs16997877

[truncated: 20 more sheets: Table S11, Table S12, Table S13, Table S14, Table S15, Table S16, Table S17, Table S18, Table S19, Table S20, Table S21, Table S22, Table S23, Table S24, Table S25, Table S26, Table S27, Table S28, Table S29, Tanble S30]
